# Supplementary material for: An S-shaped double helicene showing both multi-resonance thermally activated delayed fluorescence and circularly polarized luminescence
Source: Royal Society of Chemistry journal article supplement (doi:10.1039/d2tc00198e), 2022-01-01
Supplement: d2tc00198e2.pdf [file d2tc00198e2.pdf]

**An S-Shaped Double Helicene Showing both Multi-Resonance Thermally Activated  
Delayed Fluorescence and Circularly Polarized Luminescence**

*John Marques dos Santos,<sup>a</sup> Dianming Sun,<sup>a</sup> Juan Manuel Moreno Naranjo,<sup>b</sup> David Hall,<sup>a,c</sup>  
Francesco Zinna,<sup>d</sup> Seán T. J. Ryan,<sup>b</sup> Wenda Shi,<sup>b</sup> Tomas Matulaitis,<sup>a</sup> David B. Cordes,<sup>a</sup>  
Alexandra M. Z. Slawin,<sup>a</sup> David Beljonne,<sup>c</sup> Stuart L. Warriner,<sup>e</sup> Yoann Olivier,<sup>f\*</sup> Matthew J.  
Fuchter<sup>b\*</sup> and Eli Zysman-Colman<sup>a\*</sup>*

<sup>a</sup>Organic Semiconductor Centre, EaStCHEM School of Chemistry, University of St Andrews,  
St Andrews, KY16 9ST, UK. E-mail: eli.zysman-colman@st-andrews.ac.uk;

<sup>b</sup>Department of Chemistry, Molecular Sciences Research Hub, Imperial College London,  
White City Campus, London, W12 0BZ, UK. Email: m.fuchter@imperial.ac.uk

<sup>c</sup>Laboratory for Chemistry of Novel Materials, University of Mons, 7000 Mons, Belgium.

<sup>d</sup>Dipartimento di Chimica e Chimica Industriale, Università di Pisa, 56124 Pisa, Italy

<sup>e</sup> School of Chemistry, University of Leeds, Leeds, LS2 9JT, UK

<sup>f</sup>Laboratory for Computational Modeling of Functional Materials, Namur Institute of  
Structured Matter, Université de Namur, Rue de Bruxelles, 61, 5000 Namur, Belgium. E-  
mail: yoann.olivier@unamur.be

**Electronic Supporting Information**

|                                                                |             |
|----------------------------------------------------------------|-------------|
| <b>1. Experimental Section</b> -----                           | <b>S-3</b>  |
| <b>2. Synthetic procedures and characterization data</b> ----- | <b>S-3</b>  |
| <b>3. X-Ray Crystallography</b> -----                          | <b>S-9</b>  |
| <b>4. Photophysical data</b> -----                             | <b>S-10</b> |

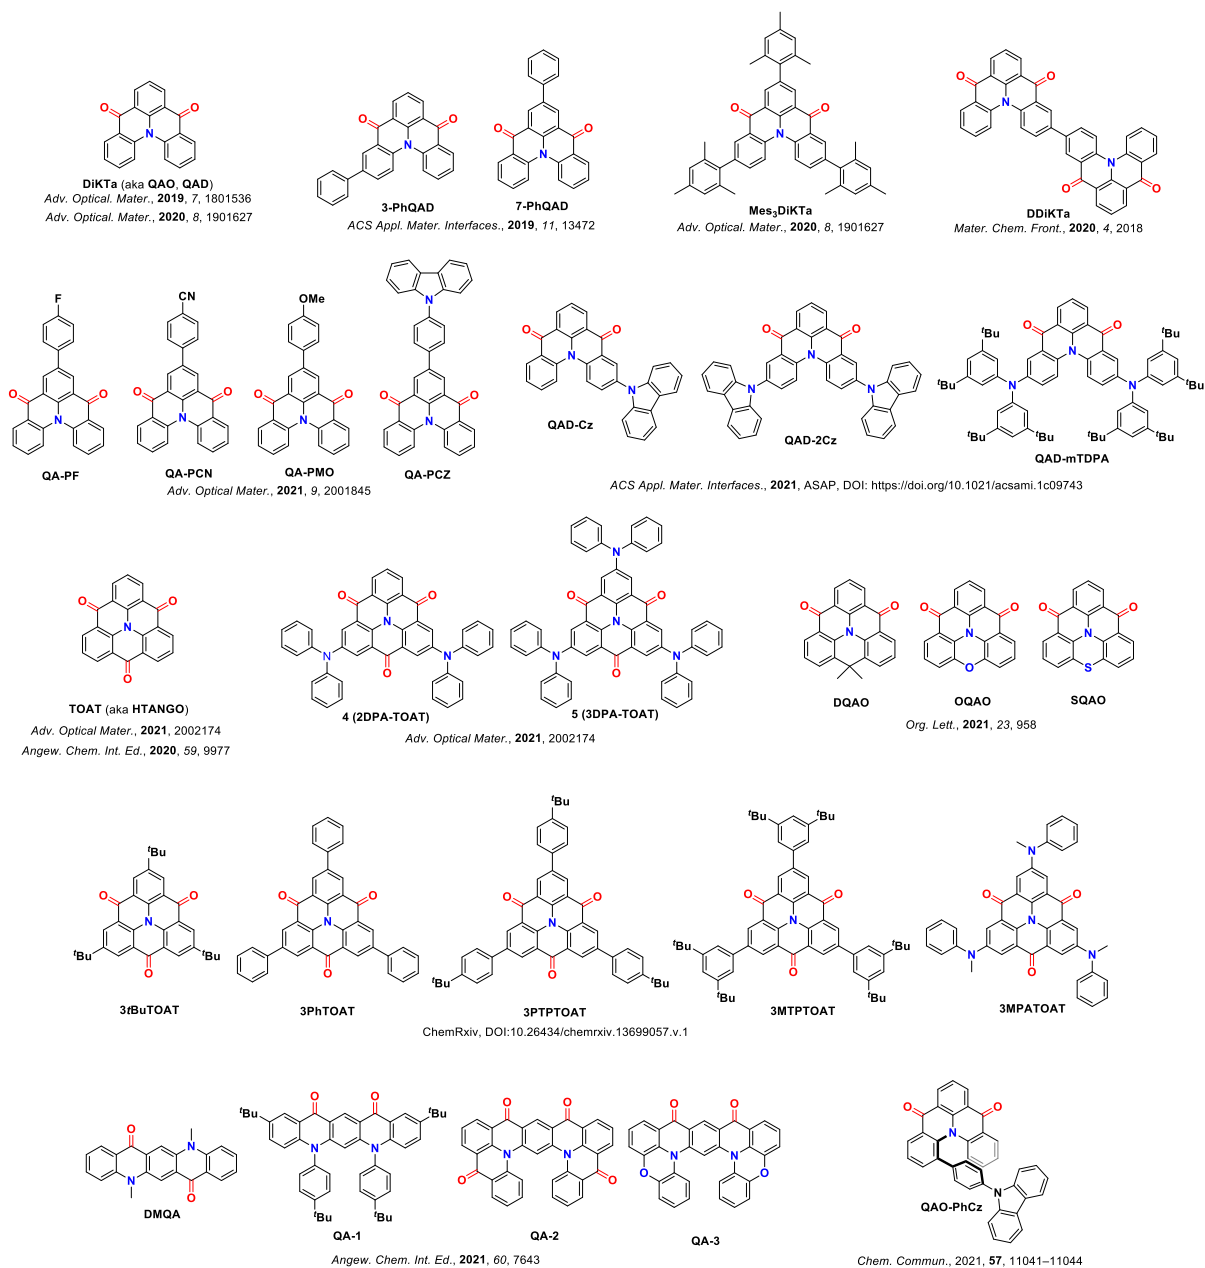

**Figure S1.** Chemical structures of prior examples of N/CO MR-TADF emitters.<sup>1,2,11,12,3–10</sup>

## 1. Experimental Section

*General Synthetic Procedures.* All reagents and solvents were obtained from commercial sources and used as received. Air-sensitive reactions were performed under a nitrogen atmosphere using Schlenk techniques, no special precautions were taken to exclude air or moisture during work-up. DCM was obtained from a MBraun SPS5 solvent purification system. Flash column chromatography was carried out using silica gel (Silia-P from Silicycle, 60 Å, 40-63 µm). Analytical thin-layer-chromatography (TLC) was performed with silica plates with aluminum backings (250 µm with F-254 indicator). TLC visualization was accomplished by 254/365 nm UV lamp. HPLC analysis was conducted on a Shimadzu LC-40 HPLC equipped with a Shim-pack GIST 3µm C18 reverse phase analytical column. GCMS analysis was conducted using a Shimadzu QP2010SE GC-MS equipped with a Shimadzu SH-Rtx-1 column (30 m × 0.25 mm). <sup>1</sup>H and <sup>13</sup>C NMR spectra were recorded on a Bruker Advance spectrometer (400 MHz for <sup>1</sup>H and either 101 or 126 MHz for <sup>13</sup>C). The following abbreviations have been used for multiplicity assignments: “s” for singlet, “d” for doublet, “t” for triplet, “m” for multiplet, and “dd” for doublet of doublets. <sup>1</sup>H and <sup>13</sup>C NMR spectra were referenced residual solvent peaks with respect to TMS (δ = 0 ppm). Melting points were measured using open-ended capillaries on an Electrothermal 1101D Mel-Temp apparatus and are uncorrected. High-resolution mass spectrometry (HRMS) was performed in the School of Chemistry of the University of Leeds.

## 2. Synthetic procedures and characterization data

### **Tetramethyl 2,2',2'',2'''-(1,3-phenylenebis(azanetriyl))tetrabenzoate (1):**

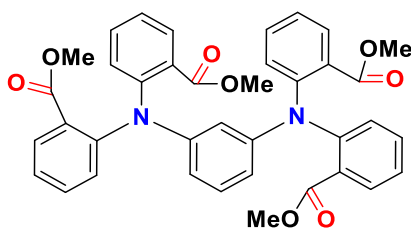

A 2-neck flask held under nitrogen was charged with benzene-1,3-diamine (2.66 g, 24.6 mmol, 1 equiv.), methyl 2-iodobenzoate (38.7 g, 21.7 mL, 148 mmol, 6 equiv.), copper (929 mg, 14.8

mmol, 0.6 equiv.), copper(I) iodide (656 mg, 3.44 mmol, 0.14 equiv.), anhydrous potassium carbonate (20.4 g, 148 mmol, 6 equiv.), and 50 mL anhydrous di-*n*-butyl ether. The resulting reaction mixture was heated to reflux and stirred for 48 hours. After cooling to room temperature, the mixture was filtered through a pad of celite. The filtrate was then mixed with dichloromethane (50 mL) and washed with water (3 × 50 mL). The organic layer was then dried over anhydrous sodium sulfate and concentrated under reduced pressure. The resulting dark brown oil was purified by column chromatography on silica gel (EtOAc : hexanes = 20 : 80). The corresponding fractions were collected and evaporated under reduced pressure to afford the desired product as a brown reddish solid (8.80 g, 55%). **R<sub>f</sub>**: 0.10 (EtOAc : hexane = 20 : 80). Mp: 170–172 °C. **<sup>1</sup>H NMR** (400 MHz, DMSO-*d*<sub>6</sub>) δ 7.46 (m, 8H), 7.13 (t, *J* = 7.5 Hz, 4H), 7.07–6.99 (m, 5H), 6.31 (dd, *J* = 8.1, 2.2 Hz, 2H), 6.15 (t, *J* = 2.2 Hz, 1H), 3.38 (s, 12H). **<sup>13</sup>C NMR** (101 MHz, DMSO-*d*<sub>6</sub>) δ 167, 149, 145, 132, 130, 129, 128, 127, 124, 115, 115, 52. **HR-MS [M+H]<sup>+</sup>** Calculated: 645.2237 (C<sub>38</sub>H<sub>33</sub>N<sub>2</sub>O<sub>8</sub>); Found: 645.2221.

**Diacridino[10,4-ab:10',4'-ij][1,7]phenanthroline-6,10,18,22-tetraone (Hel-DiDiKTa):**

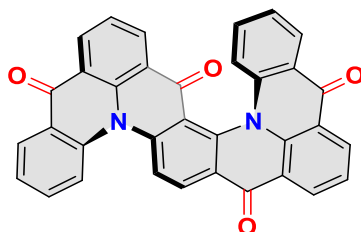

Compound **1** (5.0 g, 7.8 mmol, 1 equiv.) was combined with sodium hydroxide (3.1 g, 78 mmol, 10 equiv.) in 100 mL of an ethanol/water (1:1) mixture. The reaction was heated to reflux for 12 h. After cooling to room temperature, the pH was adjusted to 2-3 by addition of dilute hydrochloric acid. The tetra-acid precipitated as a brown greenish solid and was collected by vacuum filtration, washed thoroughly with water, dried under vacuum (4.52 g, 99% yield) and used without further purification and characterization. The tetra-acid (2.5 g, 4.25 mmol, 1 equiv.) was dispersed in 60 mL dichloromethane under a nitrogen atmosphere. To the reaction mixture were added sequentially thionyl chloride (20.2 g, 12.3 mL, 170 mmol, 40 equiv.) and 6 drops of *N,N*-dimethylformamide. After 3 h under reflux, the reaction mixture was cooled to room temperature. Under a positive flow of nitrogen, aluminium chloride (11.3 g, 85.0 mmol, 20 equiv.) was added slowly with stirring (exothermic reaction). After refluxing for 24 h, the



reaction mixture was cooled to room temperature, and the reaction quenched by slow dropwise of water under vigorous stirring (exothermic reaction). The resulting mixture was combined with more dichloromethane (50 mL), the organic layer separated and washed with water (3 × 50 mL), and then dried over anhydrous sodium sulfate. The solvent was evaporated under reduced pressure and the brown solid crude product was purified by column chromatography on silica gel (CH<sub>2</sub>Cl<sub>2</sub>:EtOAc = 7:3) to yield (*rac*)-**Hel-DiDiKTa** as an orange solid (0.79 g, 36%). **R<sub>f</sub>**: 0.60 (CH<sub>2</sub>Cl<sub>2</sub>:EtOAc = 7:3). **Mp**: > 390 °C. **<sup>1</sup>H NMR** (400 MHz, DMSO-*d*<sub>6</sub>) δ 8.71–8.50 (m, 5H), 8.37 (d, *J* = 7.9 Hz, 2H), 8.26 (m, 3H), 7.94 (t, *J* = 7.7 Hz, 1H), 7.81 (t, *J* = 7.6 Hz, 1H), 7.67 (t, *J* = 7.4 Hz, 2H), 7.46–8.50 (m, 2H). **<sup>13</sup>C NMR** (126 MHz, DMSO-*d*<sub>6</sub>) δ 179, 176, 139, 139, 133, 132, 132, 130, 127, 126, 126, 125, 125, 123, 123, 122. **Anal. Found**: C, 78.18%; H, 3.14%; N, 5.21. **Anal. Calcd. For C<sub>34</sub>H<sub>16</sub>N<sub>2</sub>O<sub>4</sub>**: C, 79.06%; H, 3.12%; N, 5.42%. **HR-MS [M+H]<sup>+</sup>** Calculated: 517.1188 (C<sub>34</sub>H<sub>17</sub>N<sub>2</sub>O<sub>4</sub>); Found: 517.1177. 99.1 % pure on HPLC analysis, retention time 31.3 minutes in 60% methanol 40% water.

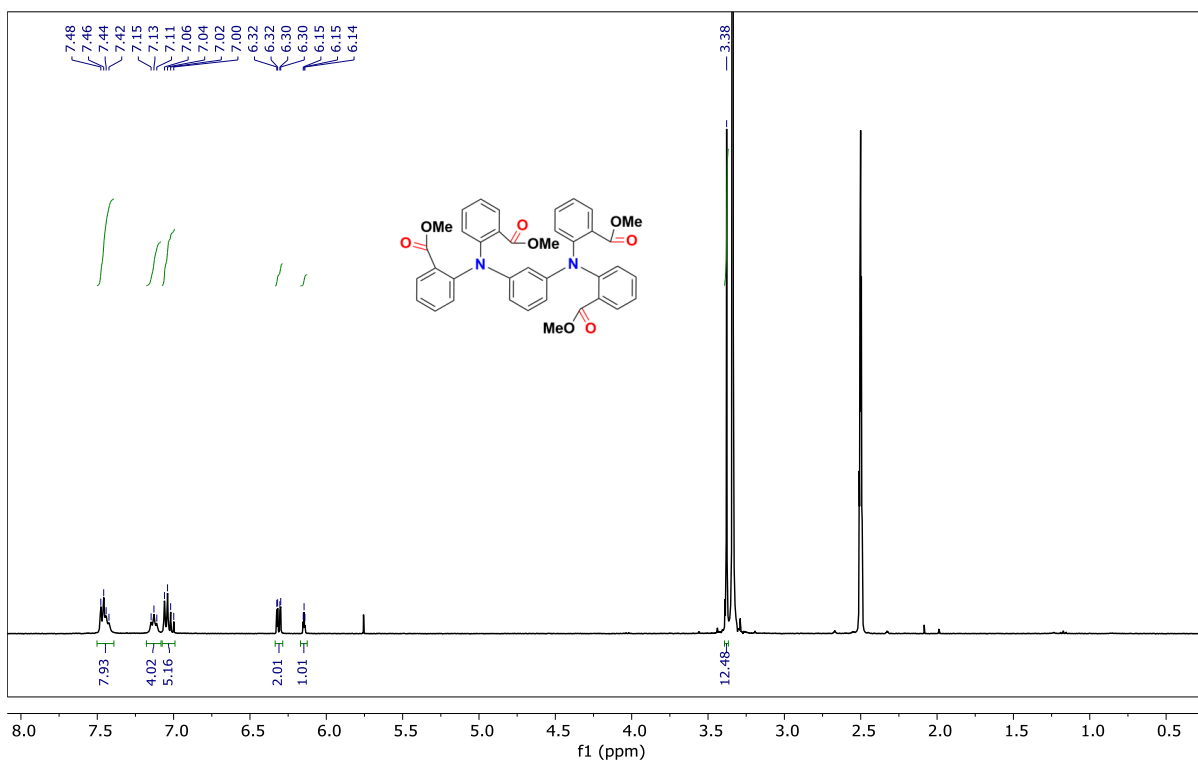

**Figure S2.** <sup>1</sup>H NMR (400 MHz, DMSO-*d*<sub>6</sub>) of compound 1.

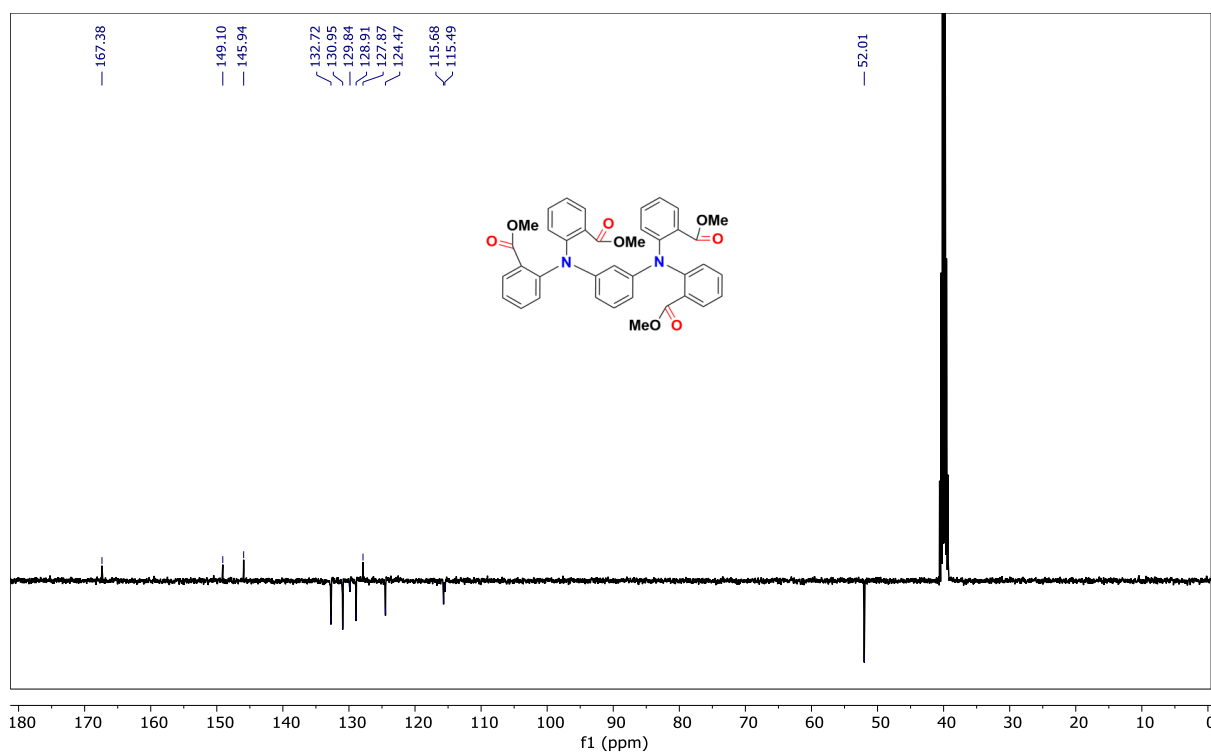

**Figure S3.** DEPTq (101 MHz, DMSO-*d*<sub>6</sub>) of compound 1.

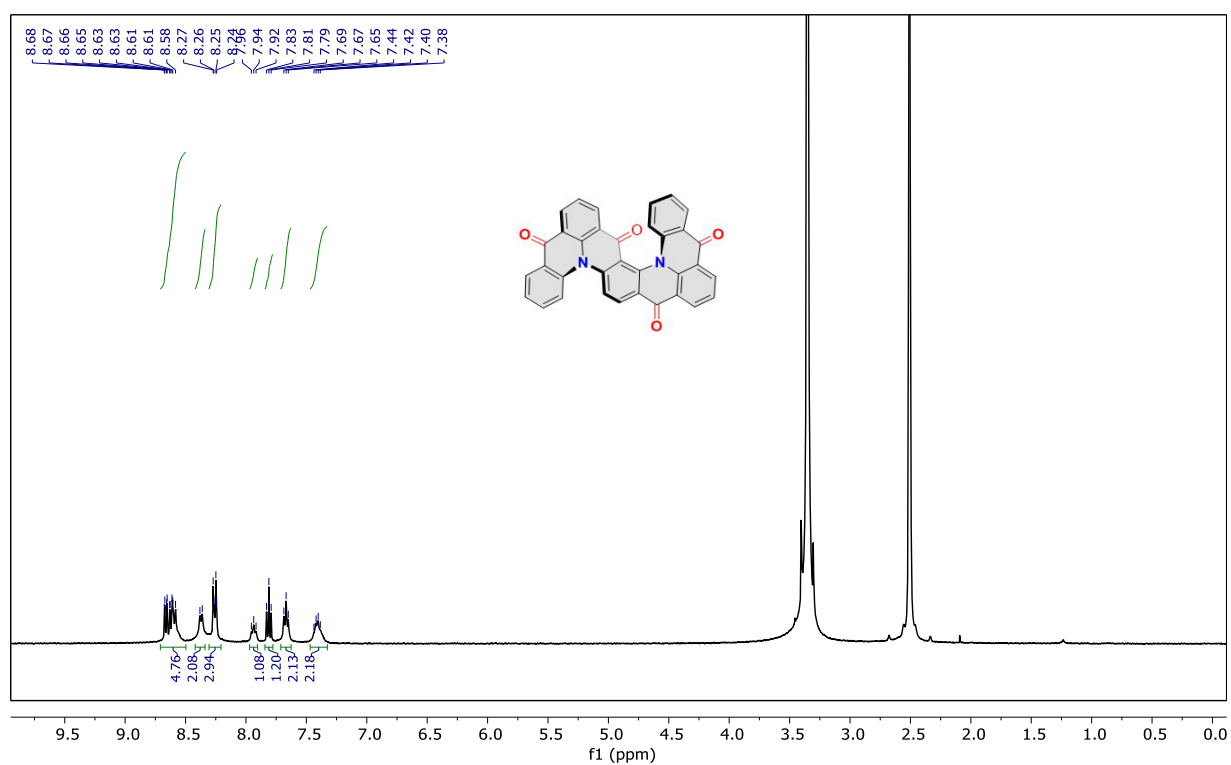

**Figure S4.**  $^1\text{H}$  NMR (400 MHz,  $\text{DMSO-}d_6$ ) of *(rac)*-Hel-DiDiKTa.

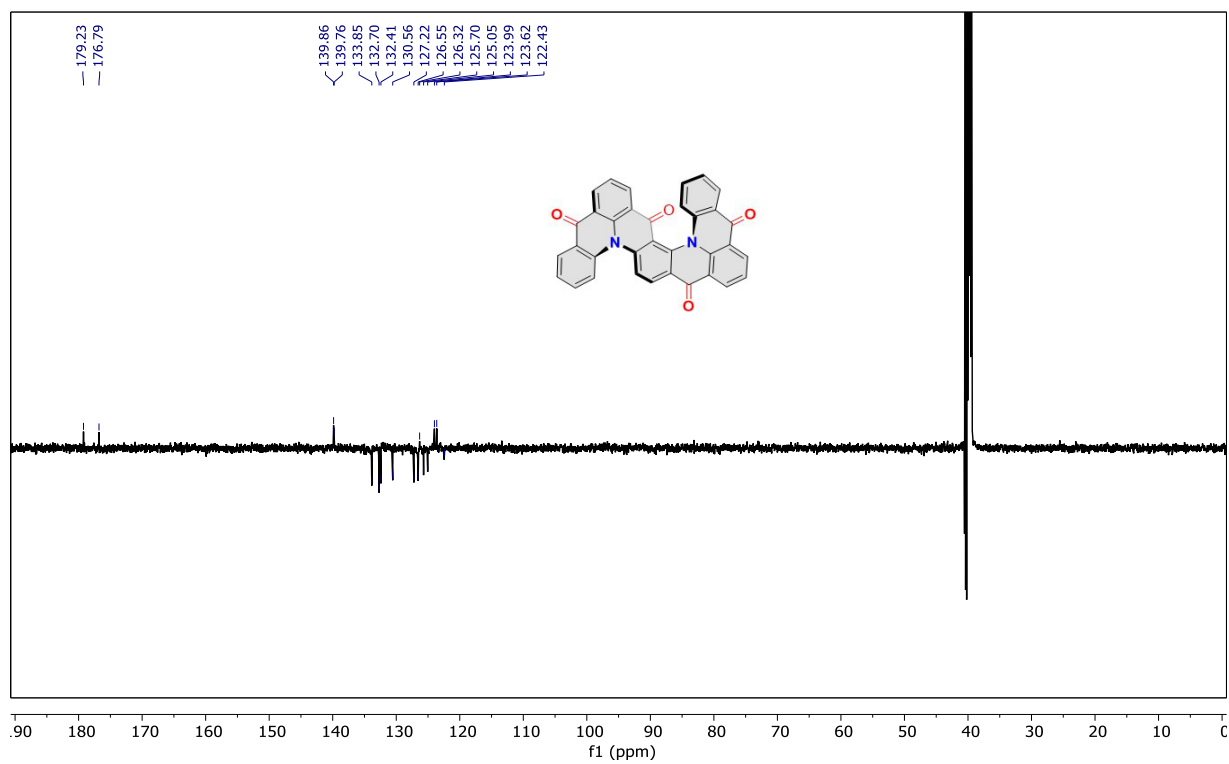

**Figure S5.** DEPTq (126 MHz,  $\text{DMSO-}d_6$ ) of *(rac)*-Hel-DiDiKTa.

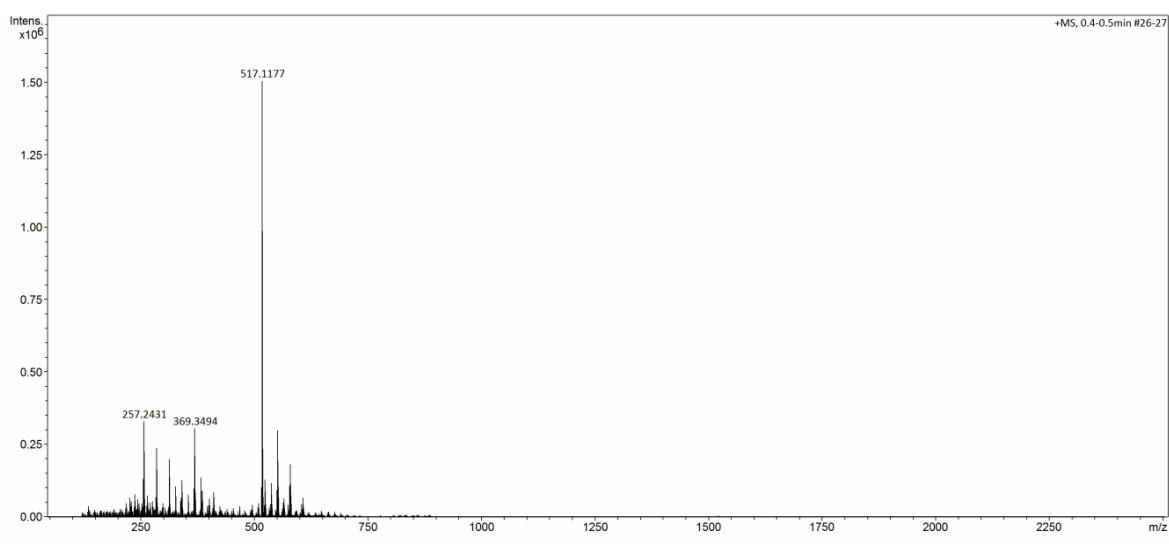

**Figure S6.** HRMS of (*rac*)-Hel-DiDiKTa.

**<Sample Information>**

Sample Name : JMDS\_012\_Run2  
 Sample ID :  
 Method Filename : 60% Methanol 40 Water 40 mins.lcm  
 Batch Filename : JMDS\_012\_Unsublimated.lcb  
 Vial # : 1-20  
 Injection Volume : 10 uL  
 Date Acquired : 06/01/2021 14:17:29  
 Date Processed : 06/01/2021 14:57:29  
 Sample Type : Unknown  
 Acquired by : System Administrator  
 Processed by : System Administrator

**<Chromatogram>**

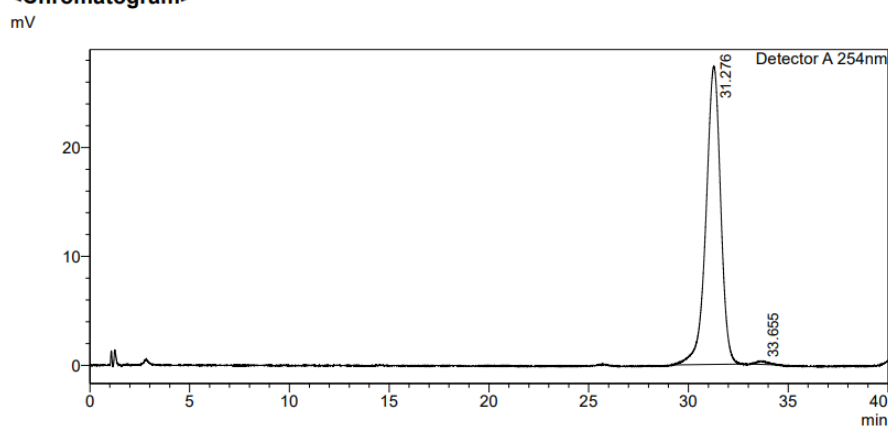

**<Peak Table>**

| Detector A 254nm |           |         |        |         |             |                    |
|------------------|-----------|---------|--------|---------|-------------|--------------------|
| Peak#            | Ret. Time | Area    | Height | Area%   | Area/Height | Width at 5% Height |
| 1                | 31.276    | 1399557 | 27357  | 99.139  | 51.158      | 1.808              |
| 2                | 33.655    | 12156   | 277    | 0.861   | 43.946      | 1.259              |
| Total            |           | 1411713 | 27634  | 100.000 |             |                    |

**Figure S7.** HPLC trace of (*rac*)-Hel-DiDiKTa.

### 3. X-Ray Crystallography

X-ray diffraction data for (*rac*)-**Hel-DiDiKTa** were collected at 173 K using a Rigaku MM-007HF High Brilliance RA generator/confocal optics with XtaLAB P100 diffractometer [Cu K $\alpha$  radiation ( $\lambda = 1.54187 \text{ \AA}$ )]. Intensity data were collected using both  $\omega$  and  $\phi$  steps accumulating area detector images spanning at least a hemisphere of reciprocal space. Data for all compounds analysed were collected using CrystalClear<sup>13</sup> and processed (including correction for Lorentz, polarization and absorption) using CrysAlisPro.<sup>14</sup> The structure was solved by dual-space methods (SHELXT<sup>15</sup>) and refined by full-matrix least-squares against F<sup>2</sup> (SHELXL-2018/3<sup>16</sup>). Non-hydrogen atoms were refined anisotropically, and hydrogen atoms were refined using a riding model. All calculations were performed using the Olex2<sup>17</sup> interface. Deposition number 2105660 contains the supplementary crystallographic data for this paper. These data are provided free of charge by the joint Cambridge Crystallographic Data Centre and Fachinformationszentrum Karlsruhe Access Structures service [www.ccdc.cam.ac.uk/structures](http://www.ccdc.cam.ac.uk/structures).

Crystal data for (*rac*)-**Hel-DiDiKTa**. C<sub>34</sub>H<sub>16</sub>N<sub>2</sub>O<sub>4</sub>,  $M = 516.49$ , orthorhombic,  $a = 14.2194(2)$ ,  $b = 14.4571(2)$ ,  $c = 21.6864(3) \text{ \AA}$ ,  $U = 4458.10(11) \text{ \AA}^3$ ,  $T = 173 \text{ K}$ , space group *Pbca* (no. 61),  $Z = 8$ , 45132 reflections measured, 4079 unique ( $R_{\text{int}} = 0.0281$ ), which were used in all calculations. The final  $R_1 [I > 2\sigma(I)]$  was 0.0399 and  $wR_2$  (all data) was 0.0974.

#### 4. Photophysical data

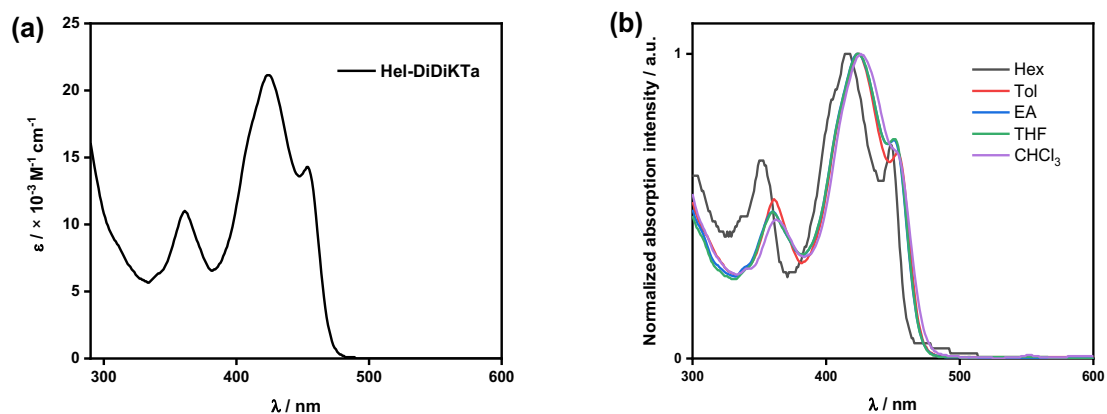

**Figure S8.** (a) Absorption spectrum of (*rac*)-**Hel-DiDiKTa** obtained in toluene ( $1.01 \times 10^{-5}$  M) at 300 K. (b) Solvatochromic absorption study of (*rac*)-**Hel-DiDiKTa**.

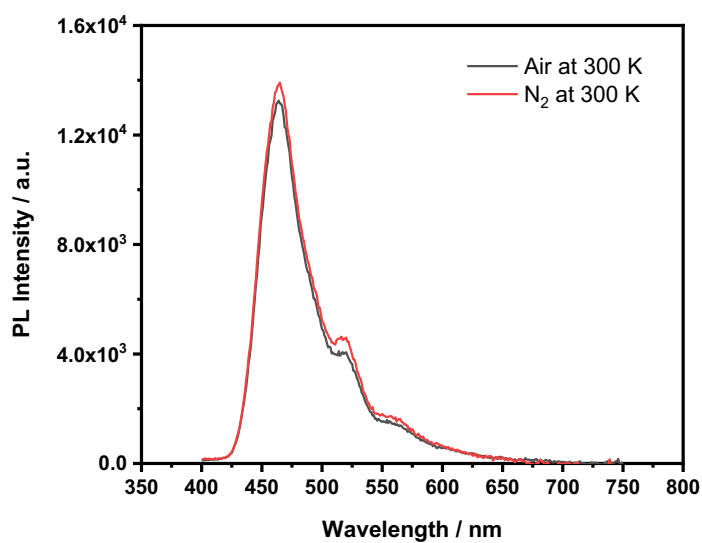

**Figure S9.** SS PL spectra of (*rac*)-**Hel-DiDiKTa** in toluene obtained in air and under  $N_2$  at 300 K,  $\lambda_{exc} = 350$  nm.

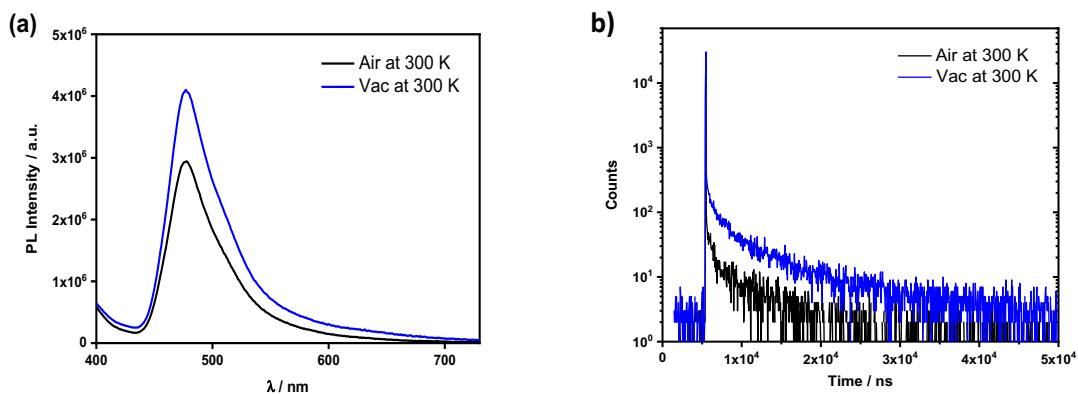

**Figure S10.** (a) SS PL spectra of (*rac*)-**Hel-DiDiKTa** in mCP in air and under vacuum at 300 K,  $\lambda_{\text{exc}} = 350$  nm. (b) Time-resolved PL of 1 wt% (*rac*)-**Hel-DiDiKTa** in mCP in air and under vacuum at 300 K,  $\lambda_{\text{exc}} = 378$  nm.

**Table S1.** Summary of solvatochromic PL properties of (*rac*)-**Hel-DiDiKTa**.

| Solvent            | $\lambda_{\text{PL}}$ <sup>a</sup> | FWHM <sup>b</sup> |
|--------------------|------------------------------------|-------------------|
|                    | nm                                 | nm / eV           |
| Hexane (Hex)       | 452                                | 42 / 0.25         |
| Toluene (Tol)      | 463                                | 44 / 0.26         |
| Ethyl acetate (EA) | 464                                | 50 / 0.28         |
| THF                | 467                                | 50 / 0.28         |
| CHCl <sub>3</sub>  | 470                                | 50 / 0.28         |

<sup>a</sup>) Peak value of PL spectra obtained under aerated conditions at 300 K, concentration  $1 \times 10^{-5}$  M,  $\lambda_{\text{exc}} = 350$  nm. <sup>b</sup>) Full width at half maximum of the corresponding PL spectra.

**Table S2.** PLQY ( $\Phi_{\text{PL}}$ ) study of (*rac*)-**Hel-DiDiKTa** at different doping concentration in mCP,  $\lambda_{\text{exc}} = 350$  nm.

| Doping concentration / % | $\Phi_{\text{PL}}(\text{N}_2)$ / % | $\Phi_{\text{PL}}(\text{air})$ / % |
|--------------------------|------------------------------------|------------------------------------|
| 3                        | 5                                  | 5                                  |
| 10                       | 4                                  | 4                                  |
| 30                       | 4                                  | 4                                  |
| 50                       | 5                                  | 4                                  |
| Neat film                | 4                                  | 4                                  |

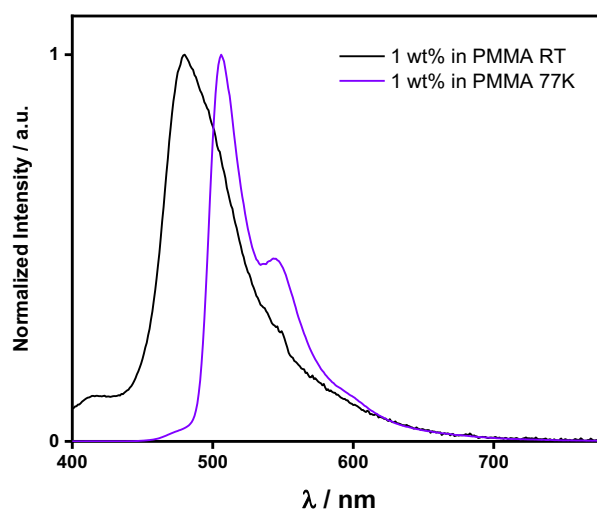

**Figure S11.** Steady state PL spectrum at RT and at 77 K of (*rac*)-**Hel-DiDiKTa** in 1 wt% PMMA.  $\lambda_{\text{exc}} = 350$  nm.

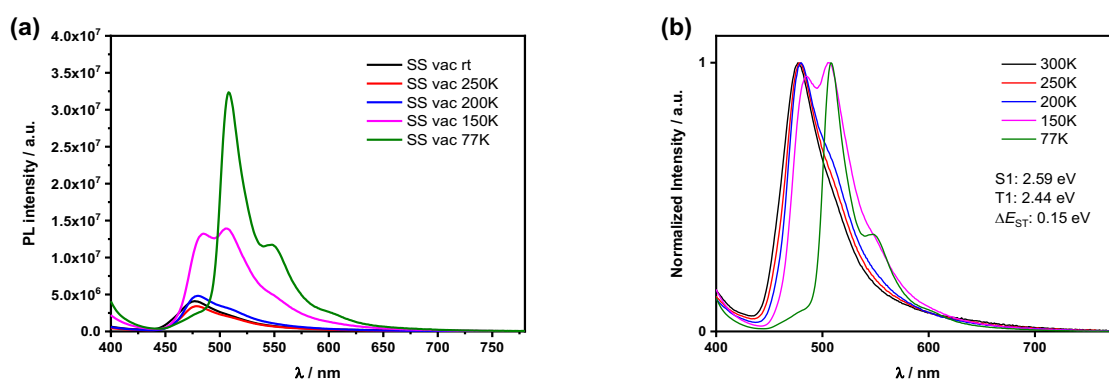

**Figure S12.** Temperature-dependent PL study of 1 wt% (*rac*)-**Hel-DiDiKTa** in mCP (a) non-normalized spectra, and (b) normalized spectra,  $\lambda_{\text{exc}} = 350$  nm.



**Table S3.**  $S_1$ ,  $T_1$  and  $\Delta E_{ST}$  values of (*rac*)-**Hel-DiDiKTa** obtained from the onsets of the prompt fluorescence and phosphorescence in different media.

| <sup>a</sup> In toluene |            |                      | <sup>b</sup> 1 wt% in mCP |            |                      | <sup>c</sup> 1 wt% in PMMA |            |                      |
|-------------------------|------------|----------------------|---------------------------|------------|----------------------|----------------------------|------------|----------------------|
| $S_1$ / eV              | $T_1$ / eV | $\Delta E_{ST}$ / eV | $S_1$ / eV                | $T_1$ / eV | $\Delta E_{ST}$ / eV | $S_1$ / eV                 | $T_1$ / eV | $\Delta E_{ST}$ / eV |
| 2.77                    | 2.51       | 0.26                 | 2.78                      | 2.52       | 0.26                 | 2.76                       | 2.53       | 0.23                 |

<sup>a</sup>)  $S_1$ ,  $T_1$  and  $\Delta E_{ST}$  values of (*rac*)-**Hel-DiDiKTa** calculated from the onsets of the prompt fluorescence and phosphorescence spectra in toluene glass at 77 K, <sup>b</sup>) in 1 wt% (*rac*)-**Hel-DiDiKTa** doped in mCP, <sup>c</sup>) and in 1 wt% (*rac*)-**Hel-DiDiKTa** doped in PMMA.

**Table S4.** Temperature-dependent Transient PL decay data of 1 wt% (*rac*)-**Hel-DiDiKTa** doped into mCP matrix.<sup>a</sup>

| Temperature | $\tau_1$ | $\tau_2$ | $\tau_3$ | $A_1$ | $A_2$ | $A_3$ | $R_1$ | $R_2$ | $R_3$ |
|-------------|----------|----------|----------|-------|-------|-------|-------|-------|-------|
|             | / ns     | / ns     | / ns     |       |       |       | %     | %     | %     |
| 300K        | 134      | 1408     | 7629     | 322   | 86    | 29    | 11.2  | 31.5  | 57.3  |
| 250K        | 75       | 2196     | 15985    | 454   | 88    | 63    | 2.8   | 15.6  | 81.7  |
| 200K        | 32       | 368      | 24142    | 1345  | 97    | 74    | 2.3   | 1.9   | 95.8  |
| 150K        | 28.6     | 1565     | -        | 295   | 4.4   | -     | 55    | 45    | -     |

<sup>a</sup>) The transient PL decay data were fitted by triple-exponential function, where  $A_i$  is the pre-exponential for lifetime  $\tau_i$ .  $R_i$  is individual component ratio for prompt and delayed fluorescence.  $R_i = \tau_i A_i / \sum \tau_i A_i$ .

### Determination of photophysical parameters

The efficiencies ( $\Phi_p$  and  $\Phi_d$ ) and constants ( $k_p$  and  $k_d$ ) for prompt and delayed emission can be estimated according to their contributions to total  $\Phi_{PL}$  and their lifetimes ( $\tau_p$  and  $\tau_d$ ) according to the triple exponential fitting of time-resolved decay curves at 300 K.

To determine the rates, we used the following equations according to previous studies<sup>18</sup> of TADF photophysical processes:

$$\Phi_{ISC} = \frac{\Phi_d / \Phi_p}{1 + \Phi_d / \Phi_p} \quad (1)$$

$$\Phi_{RISC} = \frac{k_{RISC}}{k_{RISC} + k_{nrT}} \quad (2)$$

$$k_p = \frac{\Phi_p}{\tau_p} \quad (3)$$

$$k_d = \frac{\Phi_d}{\tau_d} \quad (4)$$

$$k_r^S = \Phi_p \times k_p \quad (5)$$

$$k_{\text{ISC}} = \frac{\Phi_{\text{ISC}}}{\tau_p} \quad (6)$$

$$k_{\text{RISC}} = \frac{k_p \times k_d}{k_{\text{ISC}}} \left( \frac{\Phi_d}{\Phi_p} \right) \quad (7)$$

$$k_{\text{nr}}^{\text{T}} = k_d - \left( 1 - \frac{k_{\text{ISC}}}{k_p} \right) \times k_{\text{RISC}} = k_d - \left( 1 - \frac{k_{\text{ISC}}}{k_p} \right) \times \frac{k_d \times k_p \times \Phi_d}{k_{\text{ISC}} \times \Phi_p} \quad (8)$$

where  $\Phi_{\text{PL}}$  is the absolute  $\Phi_{\text{PL}}$ ;  $\Phi_p$  and  $\Phi_d$  are the prompt and delayed fluorescence efficiencies, respectively;  $k_p$  and  $k_d$  are the prompt and delayed fluorescence decay rate, respectively;  $\tau_p$  and  $\tau_d$  are the lifetimes of prompt and delayed fluorescence; nr, ISC and RISC are non-radiative conversion, intersystem crossing and reverse intersystem crossing processes.

**Table S5.** Photophysical properties of 1 wt% (*rac*)-**Hel-DiDiKTa** doped into mCP matrix at **300 K**

| Temperature | $\tau_p^{\text{a}}$ | $\tau_d^{\text{b}}$ | $k_p^{\text{c}}$                   | $k_d^{\text{d}}$                | $k_r^{\text{S e}}$              | $k_{\text{ISC}}^{\text{f}}$     | $k_{\text{RISC}}^{\text{g}}$    | $k_{\text{nr}}^{\text{T h}}$       | $\Phi_{\text{RISC}}^{\text{i}}$ |
|-------------|---------------------|---------------------|------------------------------------|---------------------------------|---------------------------------|---------------------------------|---------------------------------|------------------------------------|---------------------------------|
| /K          | /ns                 | / $\mu\text{s}$     | / $\times 10^4$<br>s <sup>-1</sup> | / $\times 10^3$ s <sup>-1</sup> | / $\times 10^2$ s <sup>-1</sup> | / $\times 10^6$ s <sup>-1</sup> | / $\times 10^2$ s <sup>-1</sup> | / $\times 10^3$<br>s <sup>-1</sup> | /%                              |
| <b>300</b>  | 134                 | 5.4                 | 4.2                                | 8.2                             | 2.3                             | 6.6                             | 4.1                             | 8.2                                | 4.5                             |

<sup>a)</sup> lifetime of prompt emission; <sup>b)</sup> lifetime of delayed emission; <sup>c)</sup> decay rate constant of prompt emission; <sup>d)</sup> decay rate constant of delayed emission; <sup>e)</sup> radiative decay rate constant of singlet excitons; <sup>f)</sup> intersystem crossing rate constant; <sup>g)</sup> reverse intersystem crossing rate constant; <sup>h)</sup> nonradiative decay rate constant of triplet excitons; <sup>i)</sup> percentage of reverse intersystem crossing.

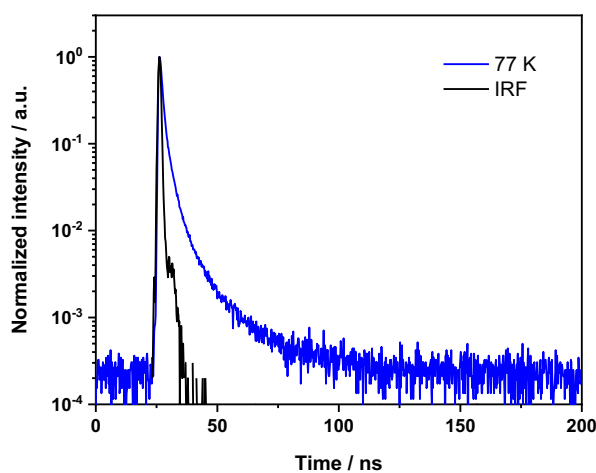

**Figure S13.** Time-resolved PL of 1 wt% (*rac*)-**Hel-DiDiKTa** in mCP under vacuum at 77 K,  $\lambda_{\text{exc}} = 378$  nm.

**Table S6.** Electrochemical data of (*rac*)-**Hel-DiDiKTa** compared to the parent **DiKTa**.<sup>2</sup>

| Compound                           | $E_{\text{ox}}^{\text{a}}$<br>/ V | $E_{\text{red}}^{\text{a}}$<br>/ V | HOMO <sup>b</sup><br>/ eV | LUMO <sup>b</sup><br>/ eV | $\Delta E^{\text{c}}$<br>/ eV |
|------------------------------------|-----------------------------------|------------------------------------|---------------------------|---------------------------|-------------------------------|
| ( <i>rac</i> )- <b>Hel-DiDiKTa</b> | 1.81                              | -1.16                              | -6.15                     | -3.18                     | 2.97                          |
| <b>DiKTa</b>                       | 1.66 <sup>2</sup>                 | -1.33 <sup>2</sup>                 | -5.93 <sup>2</sup>        | -3.11 <sup>2</sup>        | 2.82 <sup>2</sup>             |

<sup>a</sup>) Potential values obtained for (*rac*)-**Hel-DiDiKTa** from the DPV peak values, measured in degassed dichloromethane with 0.1 M [<sup>n</sup>Bu<sub>4</sub>N]PF<sub>6</sub> as the supporting electrolyte and referenced with respect to SCE (Fc/Fc<sup>+</sup> = 0.46 eV).<sup>19</sup> <sup>b</sup>) HOMO and LUMO energy levels determined using the relation  $E_{\text{HOMO/LUMO}} = -(E_{\text{ox}} / E_{\text{red}} + 4.8)$  eV (using Fc/Fc<sup>+</sup> as the internal reference);<sup>20</sup> <sup>c</sup>)  $\Delta E = |\text{HOMO} - \text{LUMO}|$  eV. <sup>2</sup> Value obtained from the literature in MeCN.

### Resolution of (*rac*)-**Hel-DiDiKTa**.

Enantiomers were isolated using a Chiralpak IE column (10 mm I.D. x 250 mm) with Toluene:EtOAc 60:40 mobile phase and 5.0 mL min<sup>-1</sup> flow rate on a recycling HPLC system (Japan Analytical Industry LC-908 HPLC) for 3 cycles and then collected (Figure **S14**). The first enantiomer initially exhibited a retention time of 9.9 min while the second enantiomer exhibited a retention time of 11.5 min. Following separation, the purity of both samples was further checked by cHPLC and UV-Vis absorption, showing high purity for each enantiomer (Figures **S15** and **S16**). Enantiomers exhibited enantiomeric ratios of (e.r.) > 99 % and > 97 % for (*P*) and (*M*) enantiomers, respectively and identical UV-Vis spectra at a concentration ~ 5×10<sup>-5</sup> M in toluene.

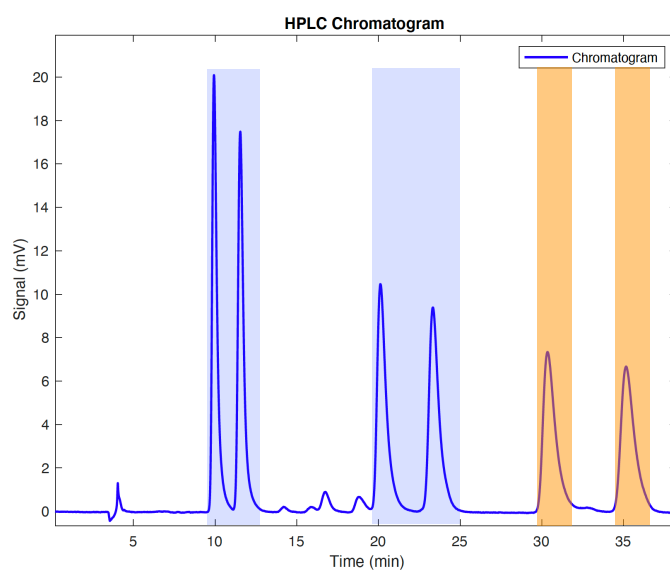

**Figure S14.** Chiral-HPLC trace of (*rac*)-Hel-DiDiKTa. In blue, recycled signals submitted to the next cHPLC cycle. In orange, collected peaks. Both enantiomeric peaks were collected on the third cHPLC cycle.

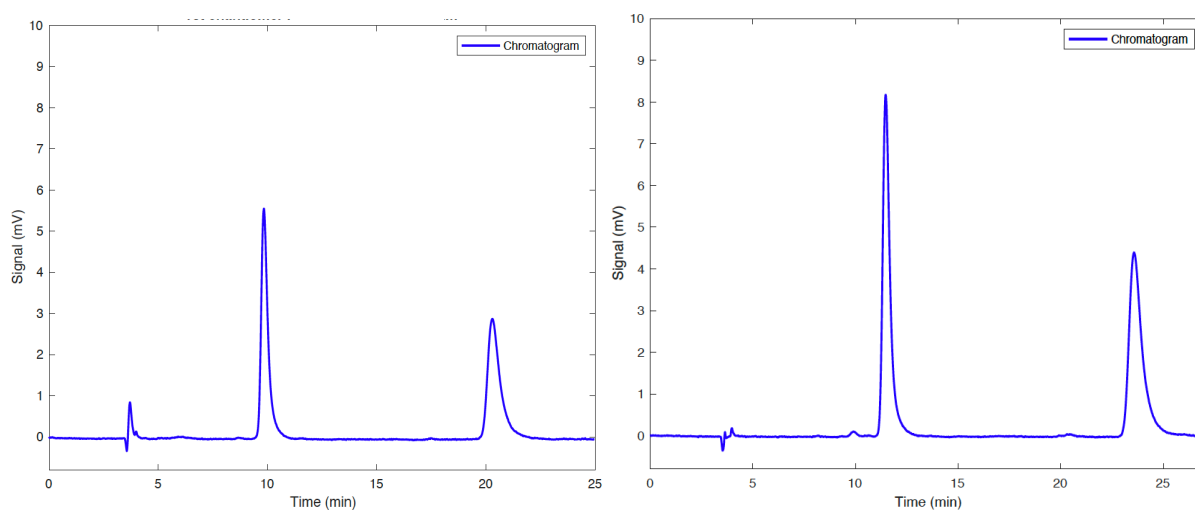

**Figure S15.** cHPLC traces for (*P*)-Hel-DiDiKTa (left) and (*M*)-Hel-DiDiKTa (right). After 2 cycles, no significant impurity signals were found.

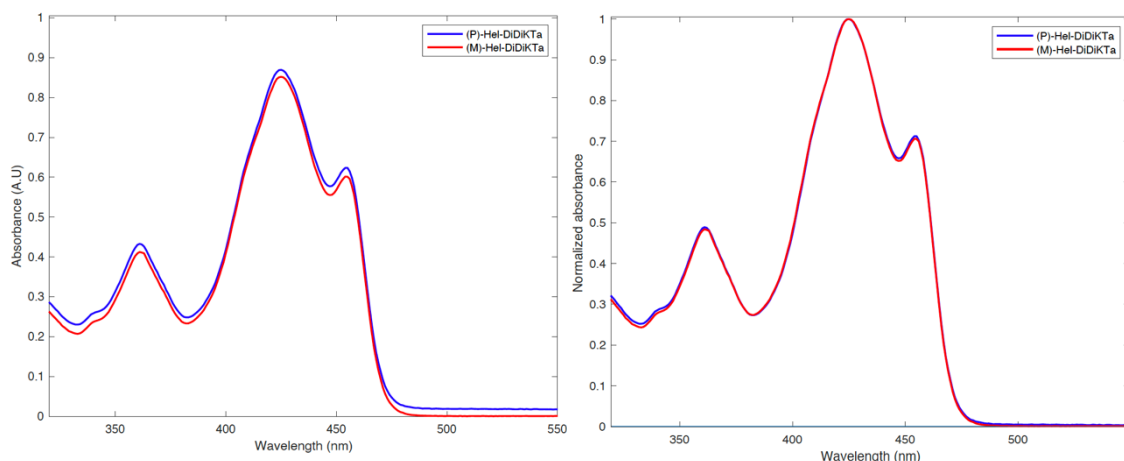

**Figure S16.** UV-Vis (left) and normalized UV-Vis (right) spectra of (*P*)-Hel-DiDiKTa and (*M*)-Hel-DiDiKTa in toluene ( $\sim 5 \times 10^{-5}$  M).

### *Chiroptical spectroscopy*

Circular-dichroism spectra were recorded in toluene at a concentration  $\sim 2.25 \times 10^{-5}$  M (Figure S17) using a Chirscan (Applied Photophysics) spectrophotometer. The absorption dissymmetry factors ( $g_{abs}$ ) values were obtained according to the following equation:

$$g_{abs} = \frac{A_L - A_R}{\frac{1}{2}(A_L + A_R)} \quad (9)$$

where  $A_L$  and  $A_R$  represent the magnitude of absorbed left- and right-handed light, respectively. Circularly polarized photoluminescence (CPPL) measurements were performed using a homemade spectrofluoropolarimeter<sup>21</sup> in toluene at a concentration of  $\sim 5 \times 10^{-6}$  M. The samples were excited by 365 nm radiation (LED source) with a  $90^\circ$  geometry between excitation and detection channels. The excitation light was linearly polarized in the same plane as detection. Parameters used: band width = 10 nm, scan speed = 1 nm sec<sup>-1</sup>, integration time 4 sec, PMT voltage 700 V, accumulations 10. The  $g_{PL}$  factor is fairly constant throughout the emission band (Figure S18) and it was quantitatively estimated as the ratio between the integral of CPL spectrum over the integral of total fluorescence.

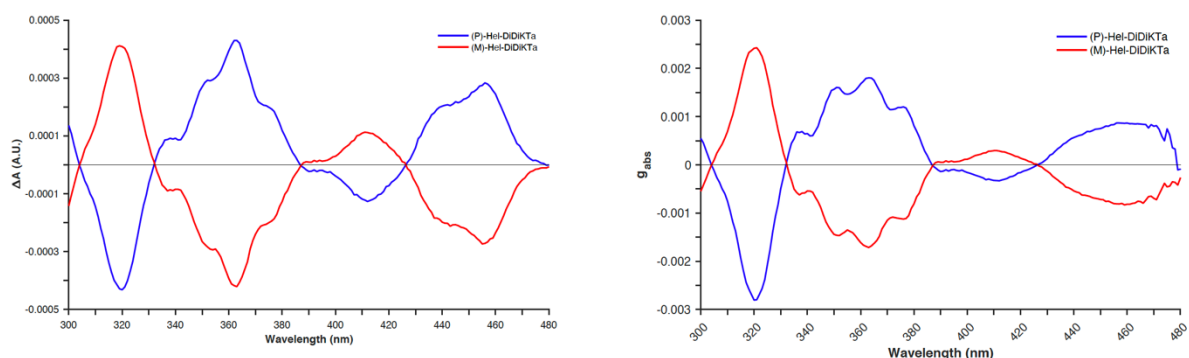

**Figure S17.** Left: CD spectra. Right:  $g_{\text{abs}}$  vs. wavelength of (*P*)-Hel-DiDiKTa and (*M*)-Hel-DiDiKTa in toluene ( $\sim 2.25 \times 10^{-5}$  M).

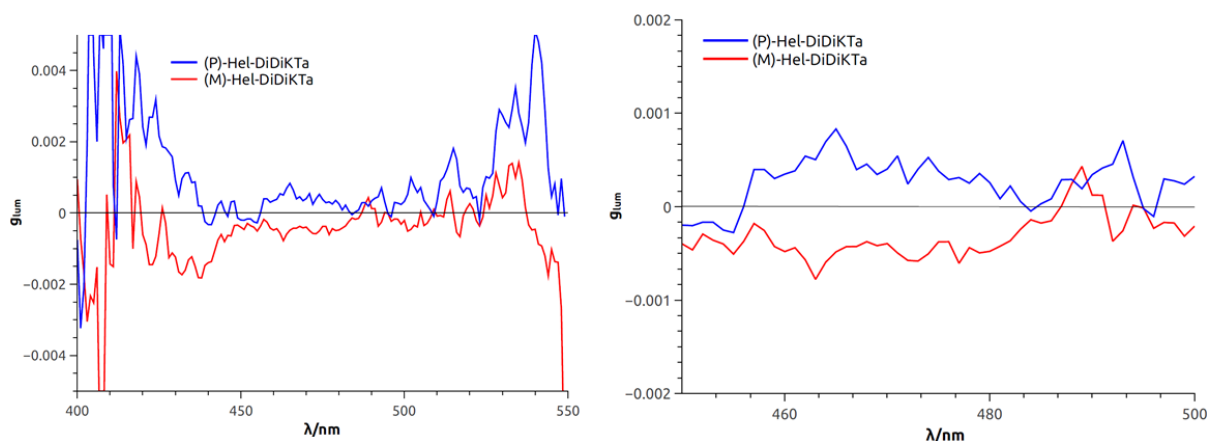

**Figure S18.** Left:  $g_{\text{PL}}$  vs. wavelength of (*P*)-Hel-DiDiKTa and (*M*)-Hel-DiDiKTa in toluene ( $\sim 5 \times 10^{-6}$  M). Right: an expansion of the 450-500 nm region of the same plot.

### *Quantum chemical calculations*

The calculations were performed with the Gaussian 16 revision A\_03<sup>22</sup> suite for the density functional theory (DFT) and with the Turbomole/7.4<sup>23</sup> package for SCS-CC2 calculations. Ground-state optimized structures were calculated using the PBE0 functional<sup>24</sup> and the 6-31G(d,p) basis set in the gas phase.<sup>25</sup> Ground state calculations were also performed with CAM-B3LYP,<sup>26</sup> B3LYP,<sup>27</sup> LCwPBE<sup>28</sup> and M062X<sup>29</sup> functionals at the same basis set. Excited state calculations were performed for each within the Tamm-Dancoff approximation (TDA). Molecular orbitals were visualized using GaussView 5.0 software.<sup>30</sup> Spin-component scaling coupled-cluster singles-and-doubles model (SCS-CC2) was also used in conjunction

with cc-pVDZ basis set.<sup>31</sup> We first optimized the ground state using SCS-CC2 method, then vertical excited states were performed on the ground state optimized structure using the SCS-CC2 method. Difference density plots were used to visualize change in electronic density between the ground and excited state and were visualized using the VESTA package.

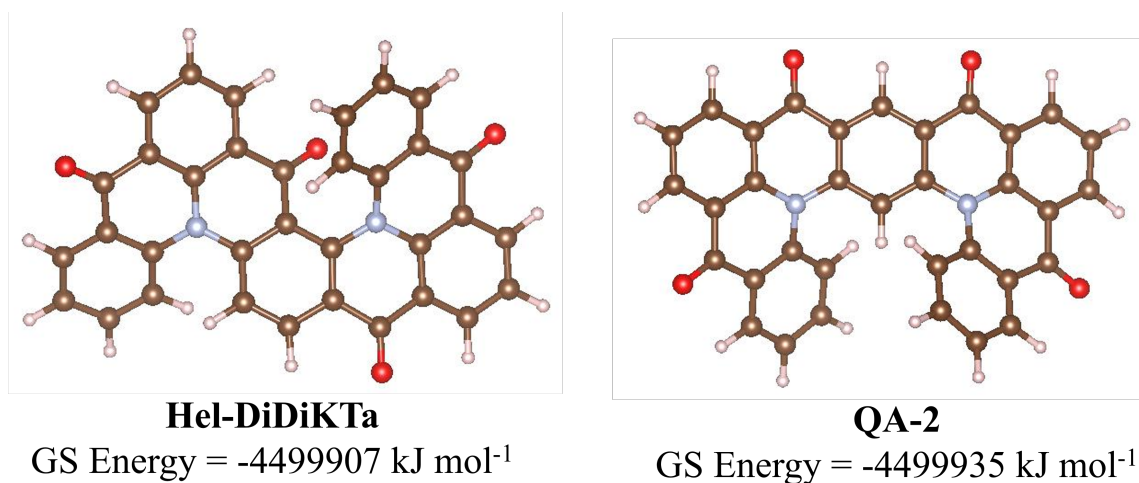

**Figure S19.** Ground state energy and pictures of **Hel-DiDiKTa** and **QA-2** calculated at PBE0/6-31 G(d,p).

**Table S7.** Overall energy of **QA-2** and **Hel-DiDiKTa** in the gas phase using various methods, DFT used 6-31G(d,p) and SCS-CC2 used cc-pVDZ basis set.

| Method          | <b>QA-2</b> energy / kJ mol <sup>-1</sup> | <b>Hel-DiDiKTa</b> energy / kJ mol <sup>-1</sup> | $\Delta_{\text{energy}}$ / kJ mol <sup>-1</sup> <sup>a</sup> |
|-----------------|-------------------------------------------|--------------------------------------------------|--------------------------------------------------------------|
| CAMB3LYP        | -4502671                                  | -4502642                                         | -29                                                          |
| LC $\omega$ PBE | -4501739                                  | -4501714                                         | -25                                                          |
| B3LYP           | -4505176                                  | -4505149                                         | -26                                                          |
| PBE0            | -4499935                                  | -4499907                                         | -29                                                          |
| M062X           | -4503030                                  | -4503003                                         | -27                                                          |
| SCS-CC2         | -4491500                                  | -4491482                                         | -18                                                          |

<sup>a</sup>) (Energy of **QA-2** – Energy of **Hel-DiDiKTa**)

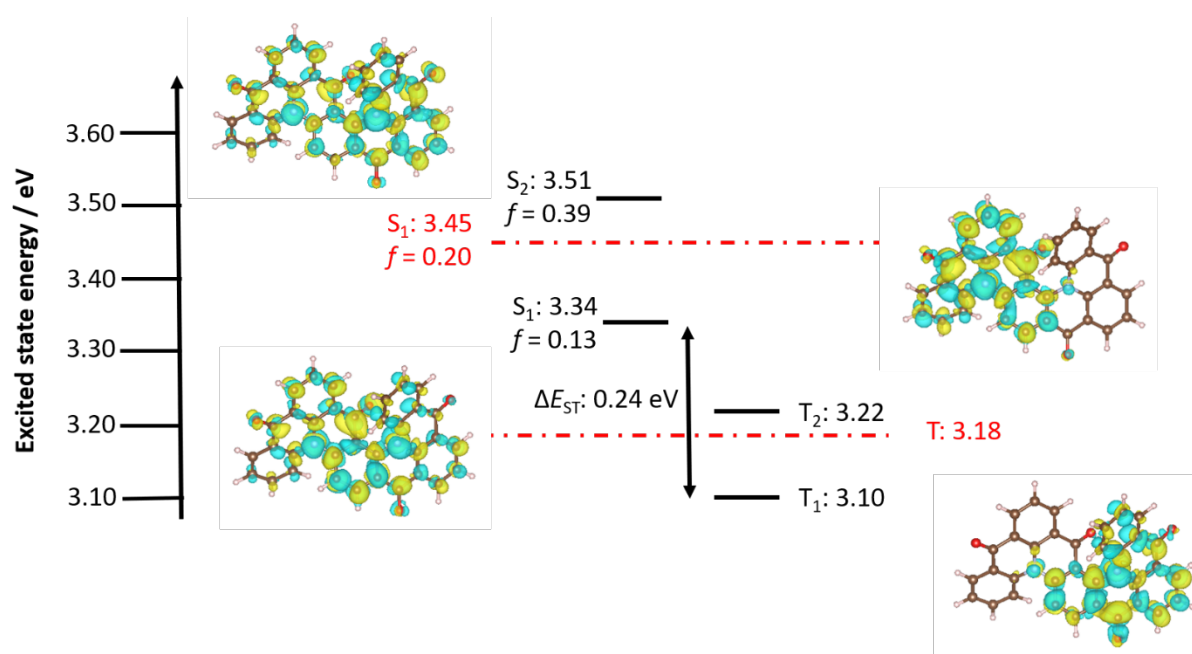

**Figure S20.** Double electronic excited state difference density plot of **Hel-DiDiKTa** and vertical excited state energies of it and the parent **DiKTa** (dashed red line).



**Table S8.** Computational data calculated in the gas phase for **Hel-DiDiKTa**, **DiKTa** and previously mentioned CPL-active triangulene, **Hel-DiKTa-2**.<sup>32</sup>

| Compound           | HOMO / eV | LUMO / eV | $\Delta E$ / eV | $S_1$ / eV ( $f$ ) | $T_1$ / eV | $T_2$ / eV | $\Delta E_{ST}$ / eV |
|--------------------|-----------|-----------|-----------------|--------------------|------------|------------|----------------------|
| <b>DiKTa</b>       | -6.20     | -2.23     | 3.97            | 3.45 (0.20)        | 3.18       | 3.60       | 0.27                 |
| <b>Hel-DiDiKTa</b> | -6.26     | -2.53     | 3.73            | 3.34 (0.13)        | 3.10       | 3.22       | 0.24                 |
| <b>Hel-DiKTa-2</b> | -5.90     | -2.24     | 3.66            | 3.29 (0.21)        | 2.79       | 3.07       | 0.51                 |

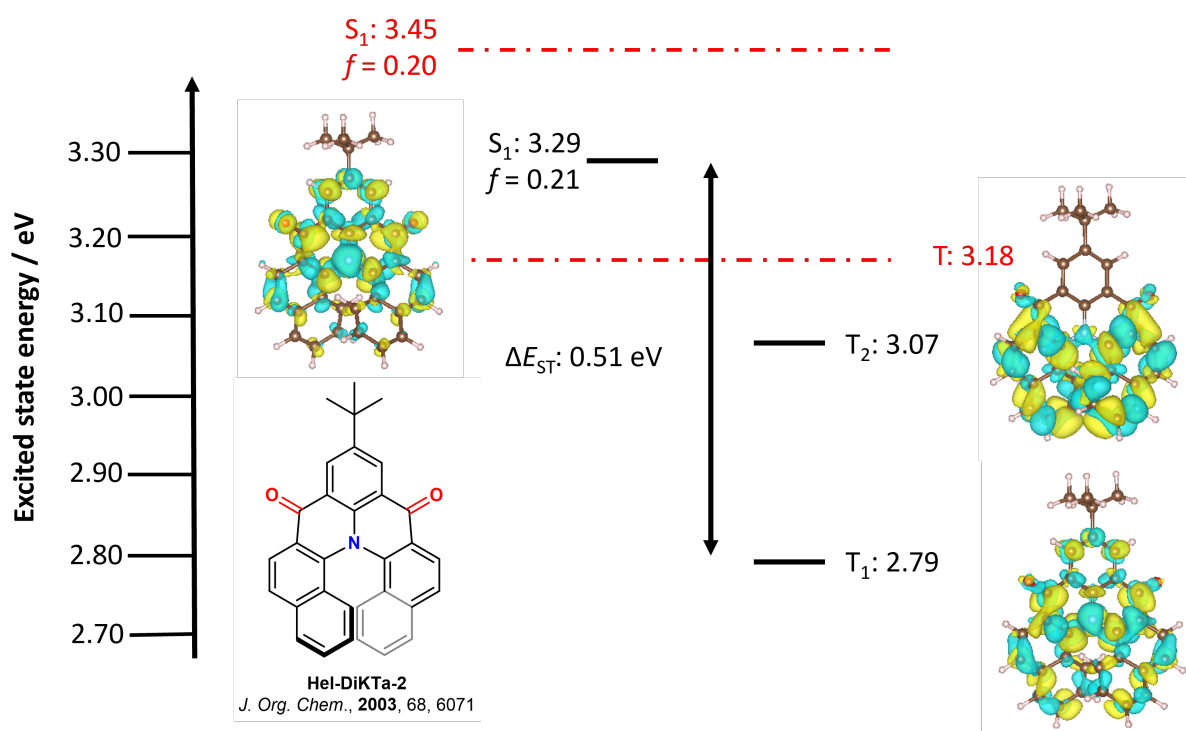

**Figure S21.** Double electronic excited state difference density plot of **Hel-DiKTa-2** and vertical excited state energies of it and the parent **DiKTa** (in dashed red lines).

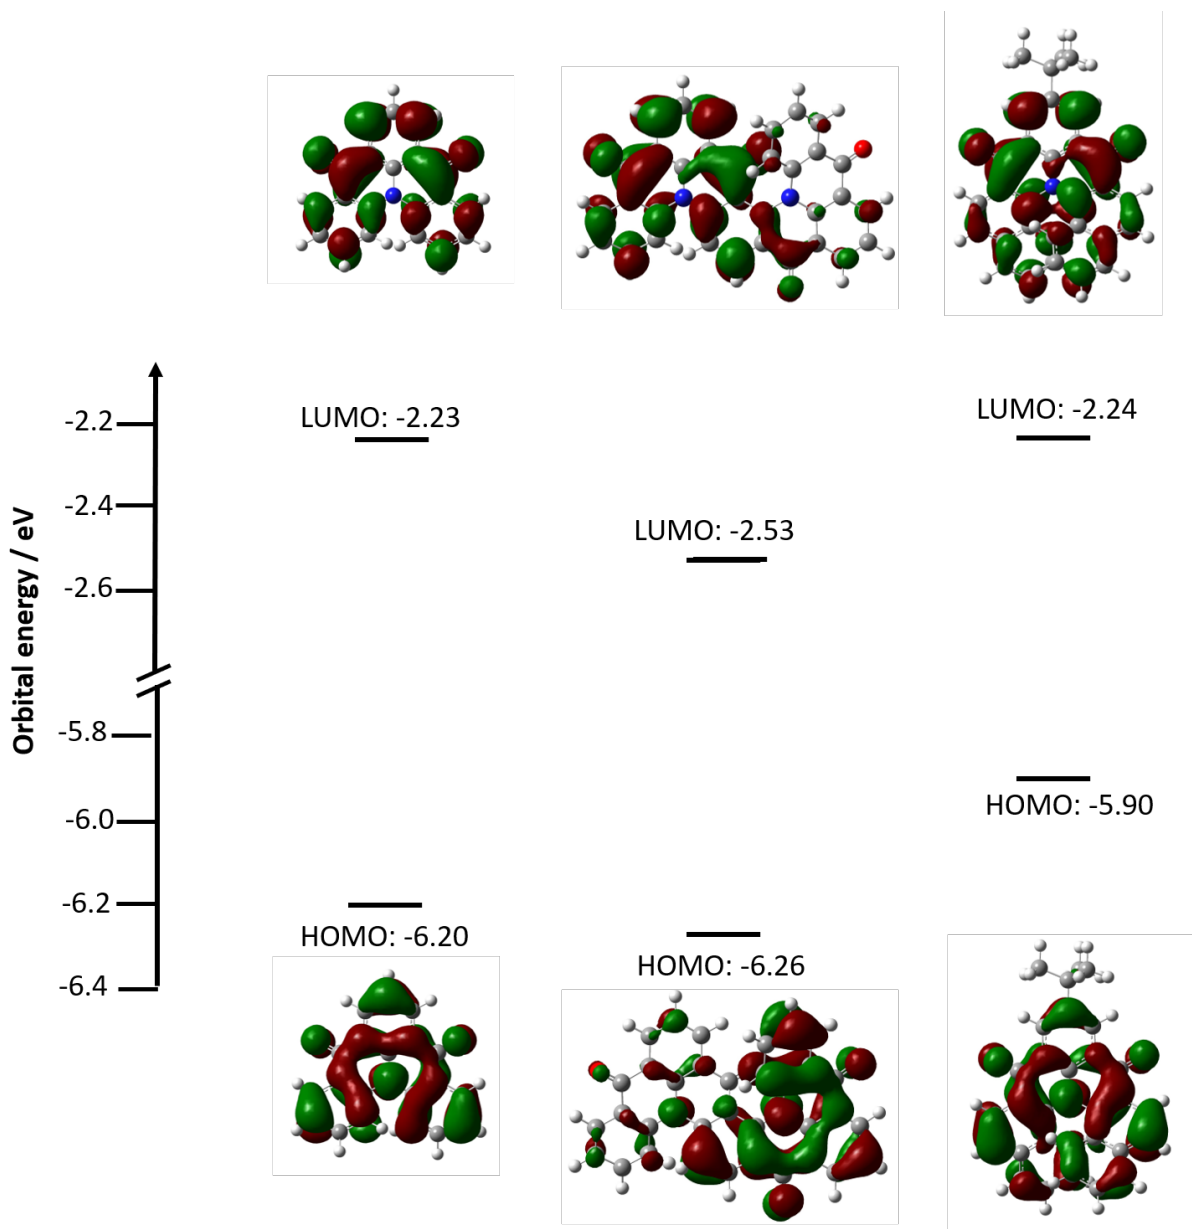

**Figure S22.** HOMO/LUMO electron density pictures and energies of the **DiKTa**, **Hel-DiKTa** and **Hel-DiKTa-2** in the gas phase calculated with PBE0/6-31g(d,p), isovalue = 0.02.

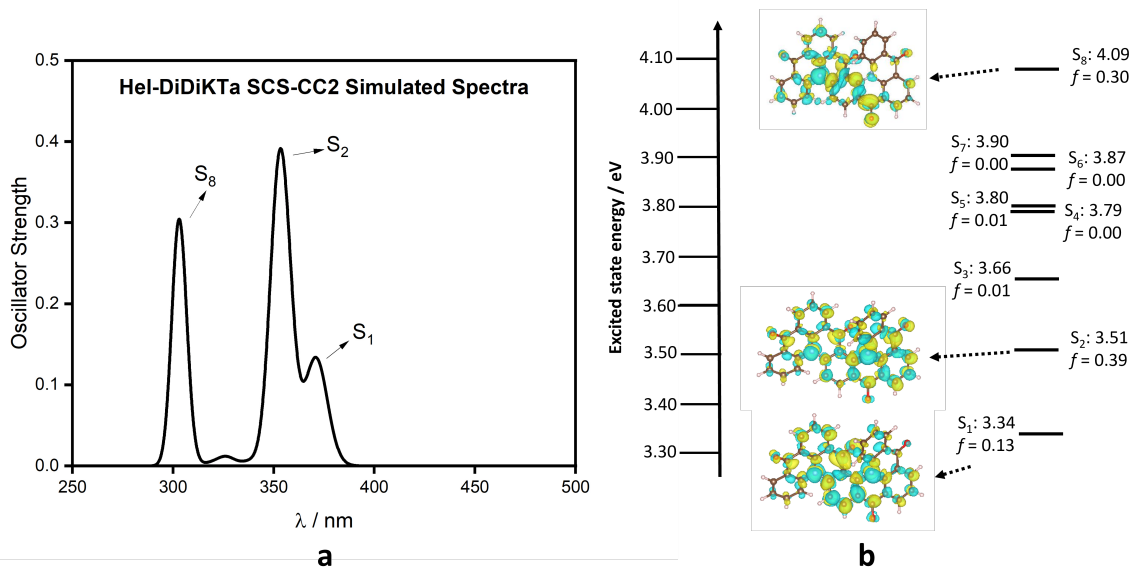

**Figure S23.** Simulated absorption spectra of **Hel-DiDiKTa** considering first 8 singlet excited states (a) and orbital levels of calculated singlet states and relevant important difference density plots (b), calculated at SCS-CC2/cc-pVDZ.

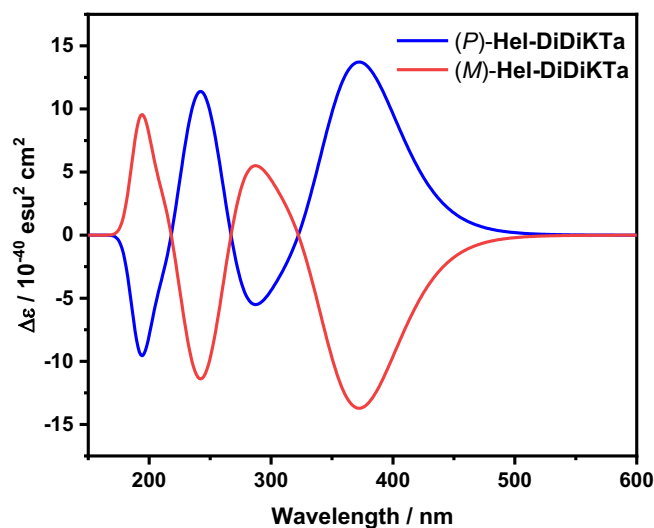

**Figure S24.** Theoretically simulated CD spectra of (P)-Hel-DiDiKTa and (M)-Hel-DiDiKTa calculated in the gas phase calculated at the TDA-DFT/PBE0/6-31g(d,p) from the first 100 singlet excited states. .

**Table S9.** Chiroptical properties of (P)-HelDiDiKTa obtained from DFT calculation.

| ETDM or $\mu / 10^{-20}$ esu·cm |         |         |          | MTDM or $m / 10^{-20}$ erg·G <sup>-1</sup> |           |         |         |               |                   |                       |
|---------------------------------|---------|---------|----------|--------------------------------------------|-----------|---------|---------|---------------|-------------------|-----------------------|
| $\mu_x$                         | $\mu_y$ | $\mu_z$ | $ \mu $  | $m_x$                                      | $m_y$     | $m_z$   | $ m $   | $\cos \theta$ | $\theta$<br>(deg) | $g_{PL}$              |
| 230.5428                        | 0.8139  | 44.5621 | 234.8115 | -0.02262856                                | -0.098583 | 0.33367 | 0.34867 | 0.1169        | 83.28             | $6.94 \times 10^{-4}$ |
| 4                               | 2       | 2       | 11       |                                            |           | 85      | 1679    | 18            | 573               |                       |

The chiroptical properties were obtained following the method reported in<sup>33</sup>, upon optimization of the molecular structure at the lowest-energy singlet excited state ( $S_1$ ) at the PBE0/6-31g(d,p) level of theory in the gas phase. electric transition dipole moment (ETDM or  $\mu$ ); magnetic transition dipole moment (MTDM or  $m$ );  $\theta$  is the angle between  $\mu$  and  $m$ .

### Enantiomerisation study

After the resolution of both enantiomers, the enantiomerisation process was studied. The CD signal decay from (***P***)-**HelDiDiKTa** dissolved in *p*-xylene at different temperatures ( $T = 75$  °C, 80 °C, 85 °C and 90 °C) was monitored over time ( $t$ ) (at 363 nm). CD measurements were carried out using a Chirascan V100 (Applied Photophysics).

For clarity, we refer to ‘enantiomerisation’ as the molecular process leading to the conversion of one chiral molecule into its opposite chirality counterpart.<sup>34,35</sup> In comparison, ‘racemisation’ is the macromolecular process by which one sample loses the enantiomeric excess over time due to enantiomerisation. Considering first order kinetics, the following equation describes the process for the enantiomerisation:

$$\ln[A]_t = -k_{\text{rac}}t + \ln[A]_o \quad (10)$$

where  $[A]_t$  refers to the concentration of the enantiomer  $A$  at a given time,  $k_{\text{rac}}$  refers to the racemisation constant at a given temperature,  $t$  refers to the time and  $[A]_o$  refers to the initial concentration of enantiomer  $A$  at  $t=0$ .<sup>34</sup> Since the value  $[A]_t$  is completely analogous to the circular dichroism signal at any given time, we can define the following equation:

$$\ln(\Delta A)_t = -k_{\text{rac}}t + \ln(\Delta A)_o \quad (11)$$

Thus, a linear fit of the natural log of the CD signal against the time results in the racemisation constant from the slope of the fit. By performing this analysis for the results obtained at each of the different temperatures, it is possible to obtain the racemisation constants at each temperature (Figures S24-S27).

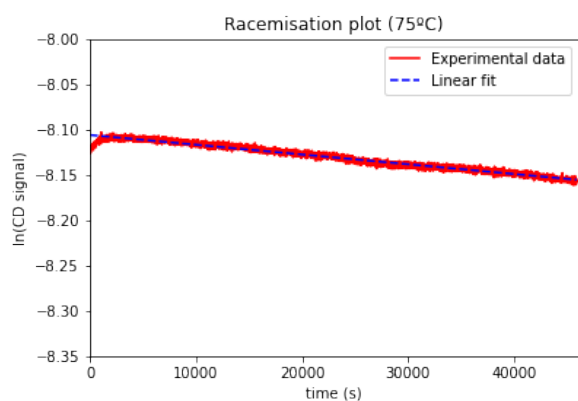

**Figure S25.** Racemisation plot at 75 °C.

| Slope                                              | Intercept                | R <sup>2</sup> |
|----------------------------------------------------|--------------------------|----------------|
| $(-1.075 \pm 0.002) \times 10^{-6} \text{ s}^{-1}$ | $(-8.10619 \pm 0.00006)$ | 0.967          |

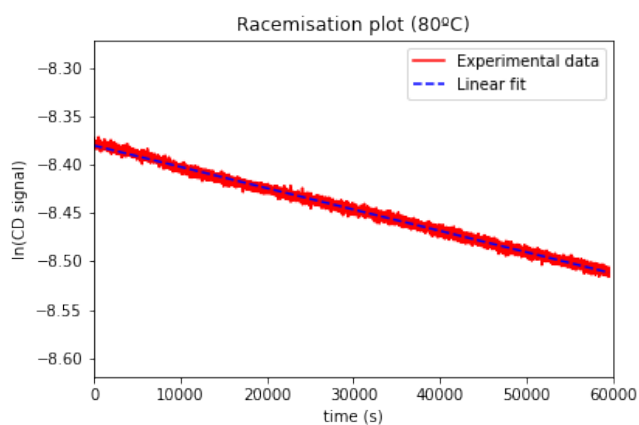

**Figure S16.** Racemisation plot at 8 0°C.

| Slope                                              | Intercept                | R <sup>2</sup> |
|----------------------------------------------------|--------------------------|----------------|
| $(-2.214 \pm 0.002) \times 10^{-6} \text{ s}^{-1}$ | $(-8.37972 \pm 0.00006)$ | 0.993          |

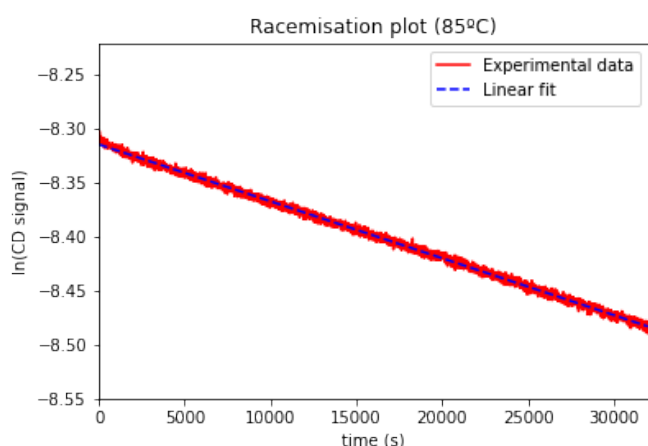

**Figure S27.** Racemisation plot at 85 °C.

| Slope                                              | Intercept                | R <sup>2</sup> |
|----------------------------------------------------|--------------------------|----------------|
| $(-5.270 \pm 0.004) \times 10^{-6} \text{ s}^{-1}$ | $(-8.31418 \pm 0.00007)$ | 0.997          |

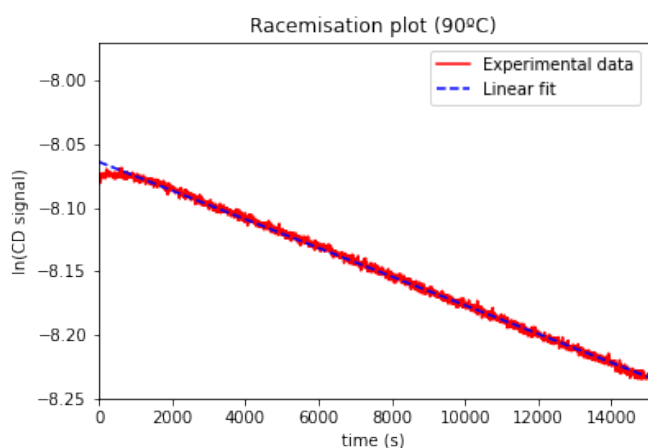

**Figure S28,** Racemisation plot at 90 °C.

| Slope                                              | Intercept              | R <sup>2</sup> |
|----------------------------------------------------|------------------------|----------------|
| $(-1.125 \pm 0.001) \times 10^{-5} \text{ s}^{-1}$ | $(-8.0641 \pm 0.0001)$ | 0.998          |

Once all the different racemisation constants have been obtained, an Eyring plot can be used to extract the thermodynamic parameters governing the process i.e., activation enthalpy ( $\Delta H_e^\ddagger$ ) and activation entropy ( $\Delta S_e^\ddagger$ ) for enantiomerisation (see equation 12). By plotting  $\ln(k_e/T)$  vs.  $1/T$ , a line with slope  $a = -(\Delta H_e^\ddagger/R)$  and y-intercept  $b = (\Delta S_e^\ddagger/R + \ln(\kappa k_B/h))$  is obtained.<sup>34</sup>

$$\ln\left(\frac{k_e}{T}\right) = -\left(\frac{\Delta H_e^\ddagger}{RT}\right) + \frac{\Delta S_e^\ddagger}{R} + \ln\left(\frac{\kappa k_B}{h}\right) \quad (12)$$

where  $R$  is the universal gas constant ( $R = 8.31446 \times 10^{-3} \text{ kJ K}^{-1} \text{ mol}^{-1}$ ),  $k_B$  is the Boltzmann constant ( $1.380662 \times 10^{-23} \text{ J K}^{-1}$ ),  $h$  is Planck's constant,  $h = 6.626176 \times 10^{-34} \text{ J s}$ ),  $k_e$  is the enantiomerisation rate constant,  $T$  is the temperature,  $\Delta H_e^\ddagger$  is the activation enthalpy for the enantiomerisation process,  $\Delta S_e^\ddagger$  is the activation entropy for the enantiomerisation process and  $\kappa$  is the transmission coefficient. At the transition state, the molecule has an equal probability to be transformed into either of the enantiomers. For this reason, the value of  $\kappa$  is set to 0.5.<sup>35,36</sup>

It is important to note that the enantiomerisation constant is required for the Eyring plot. The racemisation constants previously obtained are easily converted into their enantiomerisation counterparts using equation 13:<sup>34</sup>

$$2k_e = k_{rac} \quad (13)$$

By plotting  $\ln(k_e/T)$  vs  $1/T$  we obtain the following graph.

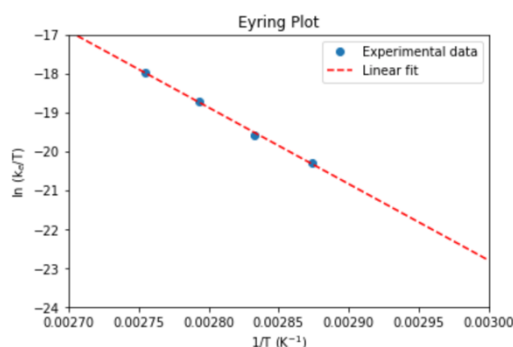

**Figure S29.** Eyring plot for **(P)-Hel-DiDiKTa**.

The linear fit obtained results in the following constants:

| a              | b      | R <sup>2</sup> |
|----------------|--------|----------------|
| (-19600±600) K | (36±2) | 0.999          |

Finally, from the Eyring equation (Equation 12), it is possible to obtain the activation enthalpy and entropy for the enantiomerisation:

$$\Delta H_e^\ddagger = -a * R \quad (14)$$

$$\Delta S_e^\ddagger = R \left[ b - \ln \left( \frac{\kappa k_B}{h} \right) \right] \quad (15)$$

The results obtained for (*P*)-Hel-DiDiKTa are shown in Table S9, along with the enantiomerisation barriers for other similar helicenes reported in the literature.

**Table S10.** Activation enthalpy, entropy and Gibbs free energy describing the automerization process obtained for (*P*)-Hel-DiDiKTa (a) and other helicenes found in the literature (b-g).

| Structure                                                                                                                | $\Delta H_e^\ddagger$                          | $\Delta S_e^\ddagger$                                         | $\Delta G_e^\ddagger$                                                                                                                                                         |
|--------------------------------------------------------------------------------------------------------------------------|------------------------------------------------|---------------------------------------------------------------|-------------------------------------------------------------------------------------------------------------------------------------------------------------------------------|
| a<br>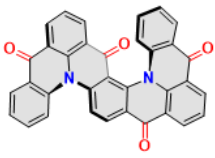<br>Hel-DiDiKTa                    | $39 \pm 1$ (kcal mol <sup>-1</sup> )           | $26 \pm 1$ (cal K <sup>-1</sup> mol <sup>-1</sup> )           | $31 \pm 2$ (kcal mol <sup>-1</sup> )<br>(298K)<br>$30 \pm 2$ (kcal mol <sup>-1</sup> )<br>(373K)                                                                              |
| b<br>                                   | $28.2$ (kcal mol <sup>-1</sup> ) <sup>37</sup> | $49.2$ (cal K <sup>-1</sup> mol <sup>-1</sup> ) <sup>37</sup> | $14$ (kcal mol <sup>-1</sup> )<br>(298K)                                                                                                                                      |
| c<br><br>a) R=H<br>b) R= <i>t</i> -Bu |                                                |                                                               | $23$ kcal mol <sup>-1</sup><br>(298K) (calc) <sup>38</sup><br>b) $31.8$ kcal mol <sup>-1</sup><br>(298K) (calc), $29$ kcal<br>mol <sup>-1</sup><br>(298K) (exp) <sup>38</sup> |
| d<br>                                 |                                                |                                                               | $32.7$ kcal mol <sup>-1</sup><br>(298K) (calc) <sup>39</sup>                                                                                                                  |
| e<br>                                 |                                                |                                                               | $29.0$ kcal mol <sup>-1</sup><br>(373K) <sup>40</sup>                                                                                                                         |
| f<br>                                 | $22.9$ (kcal mol <sup>-1</sup> ) <sup>41</sup> | $-4.1$ (cal K <sup>-1</sup> mol <sup>-1</sup> ) <sup>41</sup> | $24.1$ kcal mol <sup>-1</sup><br>(298K)                                                                                                                                       |
| g<br>                                 | $33.8$ (kcal mol <sup>-1</sup> ) <sup>42</sup> | $-6.8$ (cal K <sup>-1</sup> mol <sup>-1</sup> ) <sup>42</sup> | $35.8$ kcal mol <sup>-1</sup><br>(298K)                                                                                                                                       |



Although isomerisation studies for double helicenes are not very common, (**P**)-**Hel-DiDiKTa** possesses a higher inversion barrier (298 K) than the double S-shaped [6]-helicene reported by Jiang *et al*<sup>37</sup> (**a** versus **b**). This result highlights the high stability of **Hel-DiDiKTa**, the inversion barrier of which also falls in the same range as the double X-shaped [5]helicene **c**.<sup>38</sup>

(**P**)-**Hel-DiDiKTa** appears to have a similar enantiomerisation barrier to other bridged phenylamines<sup>39,40</sup> such as **d** and **e**. Moreover, when compared to [5] and [6]-helicene, (**P**)-**Hel-DiDiKTa** has a similar barrier as [6]helicene at room temperature (298 K).<sup>42</sup>

Finally, after obtaining  $\Delta H_e^\ddagger$  and  $\Delta S_e^\ddagger$  it is possible to calculate  $\Delta G_e^\ddagger$  (298 K). Following Equation 16 and 17, the half-life related to the enantiomerisation process at room temperature can be obtained.<sup>34</sup>

$$k_e(T) = \frac{\kappa k_B T}{h} e^{\left(\frac{-\Delta G_e^\ddagger(T)}{RT}\right)} \quad (16)$$

$$t_{\frac{1}{2}}(T) = \frac{\ln 2}{2k_e(T)} \quad (17)$$

where R is the universal gas constant ( $R = 8.31446 \times 10^{-3} \text{ kJ K}^{-1} \text{ mol}^{-1}$ ),  $k_B$  is the Boltzmann constant ( $1.380662 \times 10^{-23} \text{ J K}^{-1}$ ), h is Planck's constant,  $h = 6.626176 \times 10^{-34} \text{ J s}$ ),  $k_e$  is the enantiomerisation rate constant, T is the temperature,  $\Delta G_e^\ddagger$  is the Gibbs free energy of activation for the enantiomerisation process, and  $\kappa$  is the transmission coefficient.

For (**P**)-**Hel-DiDiKTa** the half-life obtained is ca. 310 years at room temperature (298 K). Noticeably, this value describes the moment where half of the molecules have been converted to the opposite chirality enantiomer, representing the complete racemisation of the sample and the effective loss of CD signal.

#### *Thermal stability*

Stability towards thermal decomposition was studied using thermogravimetric analysis. 1.4 mg of (**rac**)-**HelDiDiKTa** was placed in a ceramic sample holder and heated at 10 K/min under a 50 mL/min flow of N<sub>2</sub> for 80 mins. The temperature range spanned 30-800 °C. No decomposition traces were observed in this temperature range, the sample losing only 17% of the mass over the measurement (Figure S29).

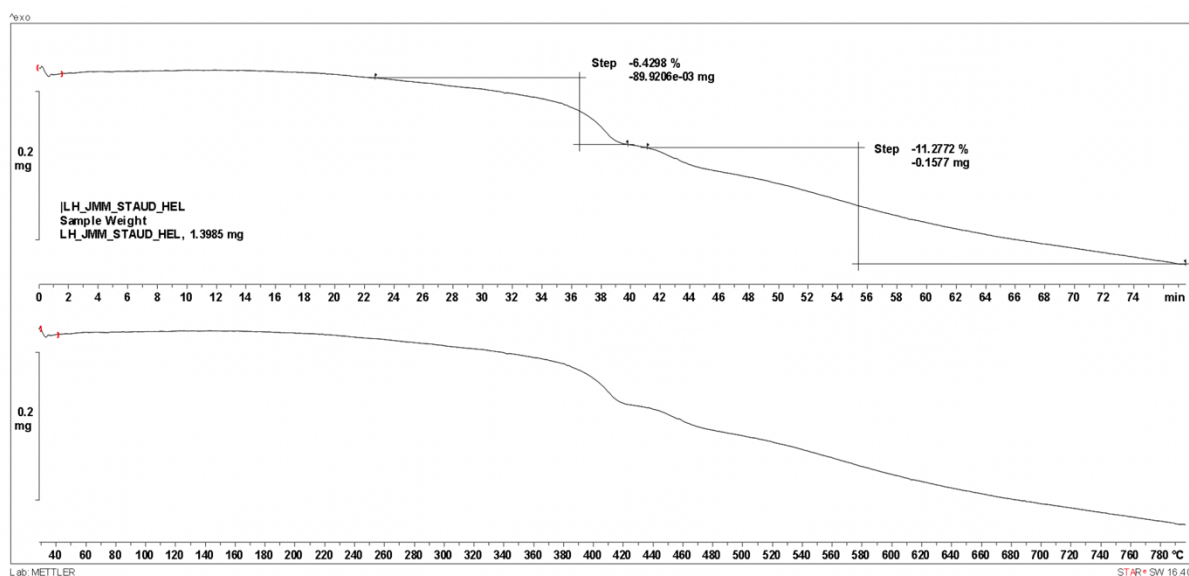

**Figure S30.** TGA analysis of *(rac)*-Hel-DiDiKTa.

## References:

- 1 Y. Yuan, X. Tang, X. Y. Du, Y. Hu, Y. J. Yu, Z. Q. Jiang, L. S. Liao and S. T. Lee, *Adv. Opt. Mater.*, 2019, **7**, 6–11.
- 2 D. Hall, S. M. Suresh, P. L. dos Santos, E. Duda, S. Bagnich, A. Pershin, P. Rajamalli, D. B. Cordes, A. M. Z. Slawin, D. Beljonne, A. Köhler, I. D. W. Samuel, Y. Olivier and E. Zysman-Colman, *Adv. Opt. Mater.*, 2020, **8**, 1901627.
- 3 X. Li, Y. Z. Shi, K. Wang, M. Zhang, C. J. Zheng, D. M. Sun, G. Le Dai, X. C. Fan, D. Q. Wang, W. Liu, Y. Q. Li, J. Yu, X. M. Ou, C. Adachi and X. H. Zhang, *ACS Appl. Mater. Interfaces*, 2019, **11**, 13472–13480.
- 4 D. Sun, S. M. Suresh, D. Hall, M. Zhang, C. Si, D. B. Cordes, A. M. Z. Slawin, Y. Olivier, X. Zhang and E. Zysman-Colman, *Mater. Chem. Front.*, 2020, **4**, 2018–2022.
- 5 X. Qiu, G. Tian, C. Lin, Y. Pan, X. Ye, B. Wang, D. Ma, D. Hu, Y. Luo and Y. Ma, *Adv. Opt. Mater.*, 2020, **9**, 2001845.
- 6 S. Zou, C. Peng, S. Yang, Y. Qu, Y. Yu, X. Chen, Z. Jiang and L. Liao, *Org. Lett.*, 2021, **23**, 958–962.
- 7 H. Min, I. S. Park and T. Yasuda, *Angew. Chemie Int. Ed.*, 2021, **60**, 7643–7648.
- 8 Y. Tsuchiya, Y. Ishikawa, S. H. Lee, X. K. Chen, J. L. Brédas, H. Nakanotani and C. Adachi, *Adv. Opt. Mater.*, 2021, **9**, 2002174.
- 9 F. Huang, K. Wang, Y. Z. Shi, X. C. Fan, X. Zhang, J. Yu, C. S. Lee and X. H. Zhang, *ACS Appl. Mater. Interfaces*, 2021, **13**, 36089–36097.
- 10 E. Hamzehpoor and D. F. Perepichka, *Angew. Chemie - Int. Ed.*, 2020, **59**, 9977–9981.

- 11 K. Wang, X.-C. Fan, Y. Tsuchiya, Y.-Z. Shi, M. Tanaka, Z. Lin, Y. Lee, X. Zhang, W. Liu, G. Dai, J.-X. Chen, B. Wu, J. Zhong, Jian-Yu Yuan, C.-J. Zheng, J. Yu, C.-S. Lee, C. Adachi and X.-H. Zhang, ChemRxiv. Cambridge Cambridge Open Engag., , DOI:10.26434/chemrxiv.13699057.v1.
- 12 S.-Y. Yang, S.-N. Zou, F.-C. Kong, X.-J. Liao, Y.-K. Qu, Z.-Q. Feng, Y.-X. Zheng, Z.-Q. Jiang and L.-S. Liao, Chem. Commun., 2021, 57, 11041–11044.
- 13 *CrystalClear-SM Expert* v2.1. Rigaku Americas. *The Woodlands, Texas, USA*, and Rigaku Corporation. *Tokyo, Japan*, 2015.
- 14 *CrysAlisPro* v1.171.40.14a. Rigaku Oxford Diffraction, Rigaku Corporation. *Oxford, U.K.*, 2018.
- 15 G. M. Sheldrick, *Acta Crystallogr., Sect. A.*, 2015, **71**, 3–8.
- 16 G. M. Sheldrick, *Acta Crystallogr. Sect. C.*, 2015, **71**, 3–8.
- 17 O. V. Dolomanov, L. J. Bourhis, R. J. Gildea, J. A. K. Howard and H. Puschmann, *J. Appl. Crystallogr.*, 2009, **42**, 339–341.
- 18 K. Goushi, K. Yoshida, K. Sato and C. Adachi, *Nat. Photonics*, 2012, **6**, 253–258.
- 19 N. G. Connelly and W. E. Geiger, *Chem. Rev.*, 1996, **96**, 877–910.
- 20 C. M. Cardona, W. Li, A. E. Kaifer, D. Stockdale and G. C. Bazan, *Adv. Mater.*, 2011, **23**, 2367–2371.
- 21 F. Zinna, T. Bruhn, C. A. Guido, J. Ahrens, M. Bröring, L. Di Bari and G. Pescitelli, *Chem. - A Eur. J.*, 2016, **22**, 16089–16098.
- 22 M. J. Frisch, G. W. Trucks, H. B. Schlegel, G. E. Scuseria, M. A. Robb, J. R. Cheeseman, G. Scalmani, V. Barone, G. A. Petersson, H. Nakatsuji, X. Li, M. Caricato, A. V. Marenich, J. Bloino, B. G. Janesko, R. Gomperts, B. Mennucci, H. P. Hratchian, J. V. Ortiz, A. F. Izmaylov, J. L. Sonnenberg, D. Williams-Young, F. Ding, F. Lipparini, F. Egidi, J. Goings, B. Peng, A. Petrone, T. Henderson, D. Ranasinghe, V. G. Zakrzewski, J. Gao, N. Rega, G. Zheng, W. Liang, M. Hada, M. Ehara, K. Toyota, R. Fukuda, J. Hasegawa, M. Ishida, T. Nakajima, Y. Honda, O. Kitao, H. Nakai, T. Vreven, K. Throssell, J. A. Montgomery, Jr., J. E. Peralta, F. Ogliaro, M. J. Bearpark, J. J. Heyd, E. N. Brothers, K. N. Kudin, V. N. Staroverov, T. A. Keith, R. Kobayashi, J. Normand, K. Raghavachari, A. P. Rendell, J. C. Burant, S. S. Iyengar, J. Tomasi, M. Cossi, J. M. Millam, M. Klene, C. Adamo, R. Cammi, J. W. Ochterski, R. L. Martin, K. Morokuma, O. Farkas, J. B. Foresman and D. J. Fox, 2016.
- 23 S. G. Balasubramani, G. P. Chen, S. Coriani, M. Diedenhofen, M. S. Frank, Y. J. Franzke, F. Furche, R. Grotjahn, M. E. Harding, C. Hättig, A. Hellweg, B. Helmich-Paris, C. Holzer, U. Huniar, M. Kaupp, A. K. Marefat, S. K. Khani, T. Müller, F. Mack, B. D. Nguyen, S. M. Parker, E. Perlt, D. Rappoport, K. Reiter, S. M. R. Roy, G. Schmitz, M. Sierka, E. Tapavicza, D. P. Tew, Artur, C. van Wullen, V. K. Voora, F. Weigend, A. Wodynski and J. M. Yu, *J. Chem. Phys.*, 2020, **152**, 184107.
- 24 C. Adamo and V. Barone, *J. Chem. Phys.*, 1999, **110**, 6158–6170.
- 25 T. H. Dunning, *J. Chem. Phys.*, 1989, **90**, 1007–1023.
- 26 T. Yanai, D. P. Tew and N. C. Handy, *Chem. Phys. Lett.*, 2004, **393**, 51–57.
- 27 A. D. Becke, *J. Chem. Phys.*, 1993, **98**, 5648–5652.
- 28 O. A. Vydrov and G. E. Scuseria, *J. Chem. Phys.*, 2006, **125**, 234109.
- 29 Y. Zhao and D. G. Truhlar, *Theor. Chem. Acc.*, 2008, **120**, 215–241.

- 30 Gauss View, Version 5. R. Dennington, T. Keith and J. Millam, 2009.
- 31 G. A. Petersson and M. A. Al-Laham, *J. Chem. Phys.*, 1991, **94**, 6081–6090.
- 32 J. E. Field, T. J. Hill and D. Venkataraman, *J. Org. Chem.*, 2003, **68**, 6071–6078.
- 33 H. Kubo, T. Hirose, T. Nakashima, T. Kawai, J. Hasegawa and K. Matsuda, *J. Phys. Chem. Lett.*, 2021, **12**, 686–695.
- 34 M. Rickhaus, L. Jundt and M. Mayor, *Chimia (Aarau)*., 2016, **70**, 192–202.
- 35 P. Ravat, *Chem. – A Eur. J.*, 2021, **27**, 3957–3967.
- 36 P. Osswald and F. Würthner, *J. Am. Chem. Soc.*, 2007, **129**, 14319–14326.
- 37 Q. Jiang, Y. Han, Y. Zou, H. Phan, L. Yuan, T. S. Heng, J. Ding and C. Chi, *Chem. - A Eur. J.*, 2020, **26**, 15613–15622.
- 38 T. Katayama, S. Nakatsuka, H. Hirai, N. Yasuda, J. Kumar, T. Kawai and T. Hatakeyama, *J. Am. Chem. Soc.*, 2016, **138**, 5210–5213.
- 39 B. D. Gliemann, A. G. Petrovic, E. M. Zolnhofer, P. O. Dral, F. Hampel, G. Breitenbruch, P. Schulze, V. Raghavan, K. Meyer, P. L. Polavarapu, N. Berova and M. Kivala, *Chem. – An Asian J.*, 2017, **12**, 31–35.
- 40 H. Nishimura, K. Tanaka, Y. Morisaki, Y. Chujo, A. Wakamiya and Y. Murata, *J. Org. Chem.*, 2017, **82**, 5242–5249.
- 41 C. Goedicke and H. Stegemeyer, *Tetrahedron Lett.*, 1970, **11**, 937–940.
- 42 R. H. Martin and M. J. Marchant, *Tetrahedron Lett.*, 1972, **13**, 3707–3708.
